# **Rewiring of Th-memory-associated gene co-expression networks underlie immunotherapy-induced changes in symptom expression in mite-sensitised atopics**

## **Authors**

Anya C. Jones PhD<sup>1</sup>, Denise Anderson MBiostat<sup>1</sup>, Niamh M. Troy BSc<sup>1,2</sup>, Dominic Mallon MBBS<sup>4</sup>, Rochelle Hartmann RN<sup>4</sup>, Michael Serralha BSc<sup>1</sup>, Barbara Holt BSc<sup>1</sup>, Anthony Bosco PhD<sup>1,#</sup>, Patrick G. Holt DSc<sup>1,3,#</sup>

## **Affiliations**

<sup>1</sup>*Telethon Kids Institute, The University of Western Australia.*

<sup>2</sup>*School of Medicine, The University of Western Australia, Perth, Australia.*

<sup>3</sup>*Child Health Research Centre, The University of Queensland, Brisbane, Australia.*

<sup>4</sup>*Dept of Clinical Immunology, Fiona Stanley Hospital, Perth, Australia*

<sup>#</sup>Joint senior authors.

## **Corresponding author**

Prof Patrick G. Holt

Telethon Kids Institute

Northern Entrance, Perth Children's Hospital

15 Hospital Avenue, Nedlands WA 6009

Telephone: +61 8 6319 1412

Fax: +618 6319 1777

Email: [Patrick.Holt@telethonkids.org.au](mailto:Patrick.Holt@telethonkids.org.au); [Marina.Stubbs@telethonkids.org.au](mailto:Marina.Stubbs@telethonkids.org.au)

## **Funding sources**

Supported by funding from ALK Abello, Horsholm, Denmark, and the National Health and Medical Research Council of Australia. AB is supported by a Fellowship from the Simon Lee Foundation. NMT is supported by Asthma Australia Mickie Hardy PhD Scholarship.

### **Conflicts of interest**

The authors declare no conflict of interest.

**Words** 3491

## **ABSTRACT**

### **Background**

Multiple regulatory mechanisms have been identified employing conventional hypothesis-driven approaches as contributing to allergen-specific immunotherapy outcomes, but understanding of how these integrate to maintain immunological homeostasis is incomplete.

### **Objective**

To explore the potential for unbiased systems-level gene co-expression network analysis to advance understanding of immunotherapy mechanisms.

### **Methods**

We profiled genome-wide allergen-specific Th-memory responses prospectively across 24mths of subcutaneous immunotherapy (SCIT) in 25 rhinitics, documenting changes in immunoinflammatory pathways and associated co-expression networks and their relationships to symptom scores to 36mths.

### **Results**

Prior to immunotherapy, mite-specific Th-memory response networks involved multiple discrete co-expression modules including those related to Th2-, Type1-IFN-, Inflammation-, and FOXP3/IL2-associated signalling. A signature comprising 109 genes correlated with symptom scores, and these mapped to cytokine signalling/T-cell activation-associated pathways, with upstream drivers including hallmark Th1/Th2- and inflammation-associated genes. Reanalysis after 3.5mths SCIT up dosing detected minimal changes to pathway/upstream regulator profiles despite 32.5% reduction in symptoms, however network analysis revealed underlying merging of FOXP3/IL2- with Inflammation- and Th2-associated modules. By 12mths on SCIT, symptoms had reduced by 41% without further significant changes to pathway/upstream regulator or network profiles. Continuing SCIT to 24mths

stabilised symptoms at 47% of baseline, accompanied by upregulation of the Type1-IFN-associated network module and its merging into the Th2/FOXP3/IL2/Inflammation module.

## Conclusions

SCIT stimulates progressive integration of Th-memory-associated Th2-,FOXP3/IL2-, Inflammation-, and Type1-IFN-signalling subnetworks, forming a single highly integrated co-expression network module, maximising potential for stable homeostatic control of allergen-specific Th2 responses via cross-regulation. Th2-antagonistic Type1-IFN signalling may play a key role in stabilising clinical effects of SCIT.

## Clinical Implication

*Stabilisation of the clinical effectiveness of SCIT involves recruitment of Th2-antagonistic Type 1 IFN-dependent signalling into the overall gene co-expression network underlying the allergen-specific Th-memory response, and this does not occur until the 2<sup>nd</sup> year of treatment.*

## Capsule summary

*SCIT-induced rewiring of the gene network governing allergen-specific Th2-memory, as opposed to selective upregulation of genes associated with regulatory functions, underlies the clinical effectiveness of immunotherapy.*



## **Key words**

Immunotherapy, CD4<sup>+</sup> Th-memory cells, inhalant allergy, rhinitis, network analysis

## **Abbreviations**

Subcutaneous immunotherapy (SCIT), specific immunotherapy (SIT), peripheral blood mononuclear cells (PBMC)

## INTRODUCTION

The primary aim of specific immunotherapy (SIT) for atopic diseases is attenuation of the downstream inflammation resulting from allergen-specific CD4<sup>+</sup>Th-memory cell activation. Multiple regulatory mechanisms are believed to contribute to SIT-induced modulation of allergen-specific Th-memory-dependent inflammatory symptoms<sup>1-4</sup>, but the understanding of precisely how these operate individually/collectively is relatively scant. Traditional approaches to this question have emphasised hypothesis-driven studies on candidate targets selected based on *a priori* knowledge, focusing on relatively limited numbers of effector/regulatory mechanisms relevant to immunoinflammatory processes. However, it is now recognised that immune responses, including those induced by allergens<sup>5,6</sup>, involve thousands of genes functioning within complex networks, and hence the application of systems-level analytical methodology which can capture and deconvolute some of this complexity may prove useful in elucidating SIT mechanisms.

In this regard, our group has previously employed genome wide expression profiling of allergen-activated CD4<sup>+</sup>T-cells to define a highly inter-correlated Th2-associated gene subnetwork that is operative in atopic children at risk of allergic disease<sup>5-7</sup>. In the analyses below we have extended this systems-level approach, to identify the full spectrum of functionally coherent gene subnetworks operating within aeroallergen-specific Th-memory responses in highly symptomatic adult atopics, and to map changes in their architecture and interconnectivity during two years of SIT, in particular changes associated with reduction in Th2-associated allergy symptoms.

## METHODS

### Study population

House dust mite (HDM) sensitised subjects with perennial rhinitis (n=25; **Table E1**) were recruited at Fremantle Hospital, Western Australia, prior to commencement of a standard 3yr course of HDM-specific subcutaneous immunotherapy (SCIT). The SCIT protocol and mechanistic study design was approved by the institutional ethics committee, and written consent obtained from all subjects.

### Immunotherapy protocol

The protocol was based on Blumberga<sup>8</sup>, utilising Alutard<sup>®</sup> SQ *Dermataphagoides pteronyssinus* (ALK, Horsholm, Denmark). Treatment included 15-week up dosing (up to 100,000 SQ-U) and 3-year maintenance with injection intervals of 6±2 weeks; patients recorded daily respiratory symptoms and medication use, the details of which were utilised to generate symptom scores at the end of designated treatment periods<sup>9</sup>.

### PBMC processing

Peripheral blood was collected prior to immunotherapy (Visit 1/V1), and at 3.5mths (V2), 12mths (V4) and 24mths into treatment (V5; **Figure E1**). PBMC were processed and cryopreserved as described<sup>10</sup>.

### Study aims and rationale

This exploratory study aimed to evaluate the potential of systems-level network analytic methodology to elucidate short-/long-term effects of SCIT on allergen-specific T-cell memory. Our approach involved stimulation of HDM-responsive CD4<sup>+</sup>Th-memory cells within PBMC

for 24hrs, enabling interactions to occur between the latter and bystander cells, prior to purifying CD4<sup>+</sup>T-cells for transcriptomic profiling. Microarray analysis was used to compute T-cell differentially expressed gene (DEG) signatures, followed by pathway analysis to identify functionally coherent pathways that map to these signatures (IL2-signalling; Th2 etc). This was carried out in conjunction with upstream regulator analysis to identify “driver” genes that are (statistically) highly likely to have contributed at an earlier stage of culture to the expression patterns seen at 24hrs, including genes triggered within bystander populations in PBMC (myeloid cells, allergen-unresponsive T-cells etc). Independently, network analysis was performed based on measurements of gene-gene connectivity across the unique genes at each visit, enabling eventual identification of both discrete and interconnected co-expression “modules” which summate to the overall “Th-memory associated co-expression network”. A subset of the subjects also received grass allergens in the SCIT treatment mix, and sub-analysis of study outcome samples after stratification by treatment did not reveal significant differences in HDM-specific DEG profiles.

### ***In vitro* cell cultures and CD4<sup>+</sup>T cell isolation**

PBMC from visits V1-V4 were thawed and cultured together employing the same batch of LPS<sup>low</sup> HDM extract(10ug/ml) or medium control for 24h<sup>10</sup>, whilst V5 was cultured as a stand-alone experiment employing the same reagent batches. CD4<sup>+</sup>T cells were harvested from cultures using Dynabeads(ThermoFisher) for total RNA extraction with TRIzol(Ambion, Life Technologies) followed by RNAeasy MinElute(Qiagen, Hilde, Germany), and subsequent microarray profiling(Affymetrix PrimeView).

### **Antibody measurement**

HDM-specific IgE and IgG4 levels were quantified by ImmunoCAP(ThermoFisher)<sup>10</sup>.

## Microarray data pre-processing and differential expression analysis

The raw microarray data are available from the Gene Expression Omnibus repository(GEO Accession #GSE122290). The gene expression data were analysed in R statistical computing software environment(version 3.4.4). A custom chip description file with updated genome information (primeviewhsentrezgcdf, version 22) was utilised to annotate probe sets to genes<sup>11</sup>. Quality control(QC) of raw microarray data was performed with *ArrayQualityMetrics*<sup>12</sup>; one case/control subject at V5 was removed based on QC plots. The robust multi-array average algorithm (*RMA*<sup>13</sup>), was used for background correction and quantile normalisation. Non-informative probe sets were filtered out using the proportion of variation accounted for by the first principal component algorithm ( $PVAC > 0.4$ <sup>14</sup>), resulting in 3264 probe sets(V1, V2 and V4) and 3825 probe sets(V5) for downstream statistical analysis.

DEG were identified using *limma*<sup>15</sup>, with a false discovery rate control for multiple testing. Quality weights were included in the linear model with the *arrayWeights()*<sup>15</sup> function. Paired samples were taken into account with the *duplicateCorrelation()*<sup>15</sup> function and the model estimates were adjusted for batch effects. We tested whether response to stimulation is associated with respiratory symptoms at each visit by including both covariates and their interaction in the linear model.

## Network analysis

Prior to network construction, the raw expression data were pre-processed separately for each visit with *RMA*<sup>13</sup> and batch variation was removed with *ComBat*<sup>16</sup>. The *PVAC*-filtered data resulted in 4027, 3042, 3912 and 3831 probe sets at V1/V2/V4/V5 respectively, and unique genes from each visit were combined resulting in 5265 genes for network analysis. Co-

expression networks were constructed employing *WGCNA*<sup>17</sup> with the following network parameters: signed networks, softpower = 11, Pearson correlation, minimum module size = 50, deepsplit = 0, merge cut height = 0.1. Principal component analysis was performed at each visit to determine the relatedness of the modules. Modules were examined for enrichment with DEG obtained with *limma* analysis. Network wiring diagrams were constructed utilising the top-weighted 800 network edges (pairwise gene-gene correlations), which were extracted from the adjacency matrix from the expression data. The networks were graphically depicted using Cytoscape<sup>18</sup> (version 3.6.1).

### **Pathways analysis**

Pathway enrichment analysis was performed with InnateDB version 5.4<sup>19</sup> based on a hypergeometric distribution and Benjamini & Hochberg corrected *P-values* ≤ 0.05.

### **Upstream regulator analysis**

Putative regulators of the gene expression patterns were identified employing Ingenuity Systems Upstream Regulator Analysis<sup>20</sup>. Molecular drivers with Benjamini & Hochberg adjusted *P-values* ≤ 0.05 and absolute *Z-scores* ≥ 2.0 were deemed significant. The overlap *P-value* measures enrichment and the *Z-score* measures activation/inhibition of the regulator.

## RESULTS

### Evolution of symptoms over time during SCIT

**Figure 1** illustrates symptom scores(mean±95% CI) at each sampling. The largest drop in symptom scores had occurred by the end of the up dosing phase (32.5% reduction; V2/3.5mths) at which point maintenance therapy commenced. The mean symptom score decline reached 37% by V4(12mths) and 51% by V5(24mths), remaining at this level to the end of treatment at V6(36mths). Consistent with the literature<sup>1-3</sup>, reductions in symptoms across the first year of SCIT were accompanied by significant increases in serum HDM-specific IgE and IgG4 (**Figure E2A/B**).

### CD4<sup>+</sup>T cell immune responses pre-treatment

The CD4<sup>+</sup>T-cell responses to HDM prior to mite allergen-specific immunotherapy(V1) comprised 1715 DEG (**Figure 2A/Table E2**). Pathways analysis demonstrated enrichment for genes associated with a number of functionally coherent pathways, in particular involving cytokine/chemokine receptor interactions, antigen processing/presentation and transcriptional activation of T-cells (**Figure 2B**). Upstream driver analysis revealed that the top-ranking putative drivers (ranked in **Figure 2C** by activation *Z-scores* and adjusted *P-values*) were dominated by those associated with Th1/Th2 immunity (including respectively IFNG/IL12; IL4/IL5), inflammation (TNF, IL1B, CSF2, STAT3) and T cell activation (CD40 ligand, CD3/TCR, CD28).

### Association of respiratory symptoms with gene expression pre-treatment

We tested whether allergen-driven T-cell response patterns were associated with respiratory symptom scores at each visit. At pre-treatment(V1) we identified a gene signature comprising

109 DEG as significantly associated with symptoms (**Figure 2D, Table E3**). Pathways analysis showed that symptom-associated genes were enriched for cytokine/cytokine-receptor interactions, Th1-/Th2-mediated signalling, calcineurin-regulated NFAT-dependent transcription in lymphocytes, whilst downregulated genes were enriched for cell-cell communication/transmembrane transport (**Figure 2E**). Upstream regulator analysis demonstrated that the top-ranking drivers were associated with T-cell activation (TCR and CD3 complexes, NFATC2, CD40LG), Th1 immunity (IL12 complex/IFNG), Th2 immunity (IL4/IL5), common gamma chain signalling (IL2, IL4, IL7, IL15, IL21), and inflammation (TNF, STAT3, STAT6, IL1B, IL18; **Figure 2F**).

We then replicated the analysis from **Figure 2D**, in this case seeking to identify gene expression patterns that were associated cross-sectionally with attenuated post-treatment respiratory symptom expression scores at V2, V4 and V5 respectively. No significant associations were detected at these later time points, indicating that the contribution of HDM-specific immunoinflammatory responses to the overall expression of clinical symptoms was significantly diminished from V2 onwards relative to pre-treatment.

### **Impact of SCIT on HDM-specific Th-memory response profiles**

We assessed HDM-induced T-cell response patterns at V2, V4 and V5. In excess of 1800 DEG were detected at each of these sampling times (**Figure 3A, Tables E4-6**). The list of up/downregulated pathways and their putative drivers at the different visits during SCIT (**Figure 3B,C**) closely resembled that identified above for V1 (**Figure 2B,C**); the notable exception was the presence of an operational/upregulated type1/2 interferon signalling pathway at V5 (**Figure 3B/C**) that were not active earlier in the time course. As illustrated in **Table I**, which shows activation *Z-scores* at each visit for the V5 upstream drivers, scores for



the IFN-associated drivers are uniformly elevated at V5, in contrast to the stable pattern for other drivers including those related to Th2 inflammation.

### Network analysis of the HDM-specific T cell responses

We next constructed weighted gene co-expression networks at each sampling time employing *WGCNA* to obtain a systems-level understanding of how T-cell responses evolved over the course of allergen-specific immunotherapy. First, we calculated ranked expression levels and ranked network connectivity, and compared the data at V1 with the subsequent visits. As illustrated in **Figure E3**, the data showed that variations in network connectivity were most striking at V2 and V5. Notably, variations in network connectivity were also evident at V4, even though no differentially expressed genes were identified between the respective responses at V1 and V4. We next examined the evolution of modular architecture of the coexpression networks over the course of SCIT. To illustrate this, we superimposed the network connectivity patterns for each visit over the modular architecture from V1 (**Figure 4A**). The data showed that V2 and V5 were characterised by the presence of strong correlation patterns between modules. Moreover, this was also reflected by changes in the modular architecture from V1 to V5 (indicated by the colours below **Figure 4B**, left panel), together with a roadmap showing the progressive re-wiring of the modules (denoted A-N) at ensuing visits (**Figure 4B**, right panel). The co-expression networks were organised into 9, 7, 10 and 6 modules respectively at V1, V2, V4 and V5 (**Figure 4B**). We then interrogated the modules for functional coherence and examined them for enrichment of DEG (**Figure 4C**). At V1 prior to immunotherapy, the modules denoted C, F, G and I, relating respectively to metabolism of proteins/Th2 immunity/inflammation/IL2-signalling, were upregulated. Of note, type1 interferon-associated genes formed a discrete module(A), however, these were not differentially expressed. Following completion of up dosing at V2, the topological architecture had become restructured

and the modules F, G and I amalgamated forming one upregulated network (module J, **Figure 4B,C**), whilst the type1 interferon network remained unchanged, and lysosome/phagosome/antigen-processing-presentation module C and TCR signalling module D were downregulated.

At V4, the IL2 signalling and Th2 network remained fused (module L) while the inflammation/lysosome/phagosome/antigen processing-presentation (G), metabolism of proteins (C), and type1 interferon-associated (A) modules remained as discrete networks (**Figure 4B,C**). Finally at V5, the original subnetworks from V1 (F, G and I) had consolidated into a single large upregulated co-expression network module (N, **Figure 4B,C**), which included re-wiring with the now upregulated interferon-associated genes which were originally within the (then quiescent) module A at V1 (**Figure 4B,C**).

To visualise these progressive changes in network architecture during the course of SCIT we plotted the top 800 network edges/connectivity patterns from *WGCNA* employing Cytoscape, focusing initially on the components of the key modules A/F/G/I from V1. **Figure 5/Figure E4** illustrates the major structural changes that occurred in network connectivity between V1 to V5, notably the merging of the initially discrete Th2-, IL2-, and Interferon-signalling modules into a single interconnected coexpression module by the end of 2yrs treatment. As shown this transition appears to involve two stages, with initial coalescing of the Th2- and IL2-signalling modules evident by the end of SCIT up dosing (V2), while final merging with the Interferon module was not observed until the second year of SCIT (V5). We also calculated network summary statistics to identify hubs and bottleneck nodes<sup>21</sup> that are thought to play central roles in network stabilisation. With respect to the key V5 module N, 10 of the top 20 hub/bottleneck genes identified via Cytoscape based on the betweenness centrality and degree

metrics<sup>21</sup> were associated with IL2/FOXP3-signalling and 4 with Type1 IFN-signalling (**Table E7**), consistent with their likely contributions to eventual consolidation of the SCIT-induced low responder phenotype.

## DISCUSSION

Successful SCIT against aeroallergens is typically a biphasic process, in which symptom improvement commences in responsive subjects within a few months and peaks within the first treatment year, however “consolidation” of the clinical effects of SCIT requires a 2<sup>nd</sup> (sometimes 3<sup>rd</sup>) year of maintenance treatment to prevent slow reversion to pre-treatment aeroallergen-responder status<sup>22,23</sup>. Current understanding of the mechanism(s) underlying desensitisation derive principally from studies focusing on the early phase of SCIT, which suggest important roles for T-regulatory cells, allergen-specific IgG4, and a broad range of other negative control mechanisms<sup>1-3</sup>. How these multiple mechanisms interact to control allergen-induced responses in this early phase of SCIT is incompletely understood, and it is not known whether the same range of mechanisms are responsible for eventual stabilisation of the SCIT-induced low-allergen-responder phenotype, or alternatively whether additional control mechanisms are induced/recruited via more prolonged treatment. In this regard it is pertinent to note that (as in **Figure E2**) specific IgE production is maintained or transiently boosted during the early period of SCIT, and declines only slowly with continuing therapy, even in subjects with markedly reduced symptoms<sup>1,2,24</sup>, inferring that Th2-polarised immunological memory against the target allergen is not completely abrogated by SCIT, but instead its downstream immunoinflammatory effects are attenuated.

Our principal aim in this study was to test whether unbiased systems-level analyses of HDM-specific Th-memory response profiles spanning the early and later(consolidation) phases of SCIT, could provide mechanistic insight into this biphasic process. Our study yielded two sets of complimentary findings, as follows.

In untreated/highly symptomatic HDM-sensitised subjects, the HDM-induced Th-memory signature is enriched for multiple genes that map to pathways associated with transcriptional activation and cytokine/cytokine-receptor interactions, and the molecular drivers of this response are dominated by hallmark Th1/Th2- and inflammation-associated genes (**Figure 2A-C**), which in turn are correlated with symptom scores (**Figure 2D-F**). This correlation was lost by the end of SCIT up dosing(at 3.5mths), but analysis of the accompanying “early post-treatment” HDM-specific DEG signature revealed minimal accompanying changes in underlying pathway/upstream driver profiles, and moreover this pattern did not change substantially throughout the initial course of ensuing maintenance therapy to 12mths (V4; **Figure 3B,C**), despite a further decline in symptom scores (**Figure 1**). Continuation of maintenance therapy for a second 12mth period resulted in stabilisation of symptom scores by 24mths at 51%(mean) below baseline(V5; **Figure 1**), and the appearance in the HDM-specific response profile of upregulated IFN-signalling (**Figure 3B; Table I**) and Type1-IFN-associated transcriptional regulators (particularly STAT1 and IRF7; **Figure 3C**).

Additional systems-level gene coexpression analyses based on network connectivity patterns provide a holistic view of the overall HDM-specific Th-memory response which is key to interpretation of these findings. As illustrated in **Figures 4/5/E4**, the use of *WCGNA* enables construction of complex networks comprising both discrete and interconnected modules, each encompassing genes which are highly correlated with each other on the basis of co-expression; exemplars in **Figure 5** are modules designated respectively “Th2 ” which includes the core IL4/IL4R/IL5/IL9/IL13 gene signature, and “IL2-signalling” encompassing IL2/IL2R/FOXP3 and related genes. Tracking the connectivity patterns between these and other functionally coherent co-expression modules within the network across the time-course of SCIT suggests that the influence of therapy on the overall allergen-induced DEG response extends beyond

quantitative effects on transcription, and importantly includes coordination/synchronisation of the expression of key sets of genes within the Th-memory response.

Thus at V1(pre-treatment) at which time prominent drivers of symptoms include Th2 effectors exemplified by IL4/IL5 and archetypal inflammatory mediators such as TNF/IL1B/IL18, the network modules associated with Th2-, inflammation-, and IL2/FOXP3-signalling were isolated in the network topology, suggesting they operate relatively independently (modules F,G,I in **Figure 4B**), resulting in a low-level of coordination between the activity of inflammatory and regulatory networks in highly symptomatic subjects. However overall network topology is radically altered during the up dosing phase of SCIT such that by V2 the Th2 and IL2/FOXP3 modules together with much of the inflammation subnetwork have coalesced into a single entity (module J/**Figure 4B**), suggesting enhanced coordination of expression of symptom-associated and regulatory genes/pathways, and this coincides with initial symptom decline and termination of the nexus between symptom scores and the overall Th-memory-induced DEG signature. The early SCIT-induced merging of these subnetworks persists in the face of further changes in network topology as therapy continues, culminating during the 2<sup>nd</sup> year of treatment with additional merging by V5 with the now upregulated IFN-signalling subnetwork, to form the single highly integrated module N (**Figure 4B**) encompassing coordinated Th2-, IL2/FOXP3-, inflammation-, and IFN-associated signalling. In contrast, modules B, C and D encompassing the key “infrastructural” activities (antigen processing/presentation, TCR activation, translation) which underpin the overall Th-memory response, remain as distinct entities throughout.

We performed additional analyses to visualise changes in network wiring across time, with particular emphasis on gene-gene connections in network module N/V5 which encompasses

the main inflammatory effector/regulatory pathways following 2yrs SCIT (**Figure 5**). As noted in Results, subsidiary analyses (**Table E7**) highlighted the prominence of genes associated with IL2/FOXP3-signalling in stabilising this network and hence consolidation of the clinical effects of SCIT. However additional findings in **Table E7** together with **Table I/ Figures 4,5** suggest that other factors related to network topology are also involved. In particular, the upregulation during the 2<sup>nd</sup> treatment year of the initially quiescent Type1-IFN module and its “wiring” into the aeroallergen-specific Th-memory-associated co-expression network at V5, may also play a key role in this stabilisation process.

In this regard, previous studies have identified the presence of Type1-IFN-associated DEG signatures in both PBMC and sputum-derived cellular response profiles in a variety of settings relevant to asthma-related immunophenotypes<sup>24, 25</sup>, with the perceived role of IFNs generally interpreted in the context of host responses to microbial triggers of acute exacerbations. However, we<sup>25</sup> and others have also shown<sup>26, 27</sup> that Type1-IFNs negatively regulate many of the downstream pro-inflammatory effects of Th2 cytokines, including IL4/IL13-induced stimulation the expression of receptors governing the endocytic, trafficking, and IgE-binding properties of myeloid cells<sup>25</sup>. It is thus conceivable that this late-stage rewiring of the network during prolonged maintenance SCIT, resulting in the introduction of coordinated Type1-IFN signalling into the aeroallergen-specific Th-memory response profile, may provide a last-line-of-defence to stabilise immunotherapy via targeting key functions of activated Th2-memory cells that evade control via T-regulatory cells and related mechanisms. Given that the primary source of Type1-IFNs are myeloid cells (particularly DC), the findings above suggest that some of the long-term effects of SCIT may include modulation of the capacity of allergen-specific-Th-memory-cells to chemoattract/cluster-with/stimulate myeloid cells that are present within the microenvironment of the Th-memory cells during their interaction with aeroallergen. There

are several earlier studies reporting SIT-associated effects on myeloid functions, including Type1 IFN response capacity of dendritic cells<sup>28-30</sup>. It is also relevant to note the parallel findings from our earlier studies<sup>31</sup> contrasting the allergen-specific Th2-memory-associated co-expression network in HDM-sensitised atopic children with its counterpart underlying childhood responses to the highly Th2-polarising Diphtheria-tetanus-acellular-pertussis(DTaP) vaccine, the administration of which does not provoke Th2-associated allergic inflammation despite stimulation of high levels of vaccine-antigen-specific IgE in some recipients<sup>32</sup>. Mirroring the post SCIT-findings above, the clinically benign Th2-polarised DTaP-specific Th-memory response also included upregulation of a prominent Th1-IFN-associated gene subnetwork, which was not observed in the corresponding allergen-specific network response<sup>31</sup>.

This exploratory study has limitations including sample size, lack of a placebo control group, and non-availability of data on Th-memory profiles in the 3<sup>rd</sup> year during SCIT, and these deficiencies require addressing in follow-up studies. Importantly, the same network analytic approach needs to be applied to characterisation of the effects of other immunotherapeutic treatments on allergen-specific Th-memory, as SCIT may not be representative of all forms of desensitisation. Notwithstanding these limitations, the study for the first time introduces the concept that remodelling of overall allergen-specific Th-memory response network topology, as opposed to simply quantitative effects on expression of key regulatory and effector genes within the response network, may be central to the efficacy of immunotherapeutic treatment modalities targeting allergy. Rapidly emerging single-cell RNA-Seq technology provides an avenue for elucidation of these network interactions with higher precision than was possible in this study, and their application may open up new possibilities for therapeutic design relevant to allergy control.



## REFERENCES

1. Akdis M, Akdis CA. Mechanisms of allergen-specific immunotherapy: multiple suppressor factors at work in immune tolerance to allergens. *J Allergy Clin Immunol*. 2014;133(3):621-31.
2. Akdis CA, Akdis M. Advances in allergen immunotherapy: aiming for complete tolerance to allergens. *Sci Transl Med*. 2015;7(280):280ps6.
3. Shamji MH, Durham SR. Mechanisms of allergen immunotherapy for inhaled allergens and predictive biomarkers. *J Allergy Clin Immunol*. 2017;140(6):1485-98.
4. Globinska A, Boonpiyathad T, Satitsuksanoa P, Kleuskens M, van de Veen W, Sokolowska M, et al. Mechanisms of allergen-specific immunotherapy: Diverse mechanisms of immune tolerance to allergens. *Ann Allergy Asthma Immunol*. 2018;121(3):306-12.
5. Bosco A, McKenna KL, Devitt CJ, Firth MJ, Sly PD, Holt PG. Identification of novel Th2-associated genes in T memory responses to allergens. *Journal of immunology (Baltimore, Md : 1950)*. 2006;176(8):4766-77.
6. Troy NM, Hollams EM, Holt PG, Bosco A. Differential gene network analysis for the identification of asthma-associated therapeutic targets in allergen-specific T-helper memory responses. *BMC Med Genomics*. 2016;9:9.
7. Bosco A, McKenna KL, Firth MJ, Sly PD, Holt PG. A network modeling approach to analysis of the Th2 memory responses underlying human atopic disease. *Journal of immunology*. 2009;182(10):6011-21.
8. Blumberga G, Groes L, Dahl R. SQ-standardized house dust mite immunotherapy as an immunomodulatory treatment in patients with asthma. *Allergy*. 2011;66(2):178-85.

9. Bufer A, Eberle P, Franke-Beckmann E, Funck J, Kimmig M, Klimek L, et al. Safety and efficacy in children of an SQ-standardized grass allergen tablet for sublingual immunotherapy. *J Allergy Clin Immunol.* 2009;123(1):167-73 e7.
10. Hollams EM, Devereil M, Serralha M, Suriyaarachchi D, Parsons F, Zhang G, et al. Elucidation of asthma phenotypes in atopic teenagers through parallel immunophenotypic and clinical profiling. *J Allergy Clin Immunol.* 2009;124(3):463-70, 70 e1-16.
11. Dai M, Wang P, Boyd AD, Kostov G, Athey B, Jones EG, et al. Evolving gene/transcript definitions significantly alter the interpretation of GeneChip data. *Nucleic Acids Res.* 2005;33(20):e175.
12. Kauffmann A, Gentleman R, Huber W. arrayQualityMetrics--a bioconductor package for quality assessment of microarray data. *Bioinformatics (Oxford, England).* 2009;25(3):415-6.
13. Irizarry RA, Hobbs B, Collin F, Beazer-Barclay YD, Antonellis KJ, Scherf U, et al. Exploration, normalization, and summaries of high density oligonucleotide array probe level data. *Biostatistics.* 2003;4(2):249-64.
14. Lu J, Kerns RT, Peddada SD, Bushel PR. Principal component analysis-based filtering improves detection for Affymetrix gene expression arrays. *Nucleic Acids Res.* 2011;39(13):e86.
15. Ritchie ME, Phipson B, Wu D, Hu Y, Law CW, Shi W, et al. limma powers differential expression analyses for RNA-sequencing and microarray studies. *Nucleic Acids Res.* 2015;43(7):e47.
16. Leek JT, Johnson WE, Parker HS, Jaffe AE, Storey JD. The sva package for removing batch effects and other unwanted variation in high-throughput experiments. *Bioinformatics (Oxford, England).* 2012;28(6):882-3.

17. Miller JA, Horvath S, Geschwind DH. Divergence of human and mouse brain transcriptome highlights Alzheimer disease pathways. *Proc Natl Acad Sci U S A*. 2010;107(28):12698-703.
18. Shannon P, Markiel A, Ozier O, Baliga NS, Wang JT, Ramage D, et al. Cytoscape: a software environment for integrated models of biomolecular interaction networks. *Genome Res*. 2003;13(11):2498-504.
19. Breuer K, Foroushani AK, Laird MR, Chen C, Sribnaia A, Lo R, et al. InnateDB: systems biology of innate immunity and beyond--recent updates and continuing curation. *Nucleic Acids Res*. 2013;41(Database issue):D1228-33.
20. Krämer A, Green J, Pollard J, Jr., Tugendreich S. Causal analysis approaches in Ingenuity Pathway Analysis. *Bioinformatics (Oxford, England)*. 2014;30(4):523-30.
21. Yu H, Kim PM, Sprecher E, Trifonov V, Gerstein M. The importance of bottlenecks in protein networks: correlation with gene essentiality and expression dynamics. *PLoS Comput Biol*. 2007;3(4):e59.
22. Jutel M, Agache I, Bonini S, Burks AW, Calderon M, Canonica W, et al. International consensus on allergy immunotherapy. *J Allergy Clin Immunol*. 2015;136(3):556-68.
23. Penagos M, Eifan AO, Durham SR, Scadding GW. Duration of Allergen Immunotherapy for Long-Term Efficacy in Allergic Rhinoconjunctivitis. *Curr Treat Options Allergy*. 2018;5(3):275-90.
24. Bosco A, Ehteshami S, Panyala S, Martinez FD. Interferon regulatory factor 7 is a major hub connecting interferon-mediated responses in virus-induced asthma exacerbations in vivo. *J Allergy Clin Immunol*. 2012;129(1):88-94.
25. Subrata LS, Bizzantino J, Mamessier E, Bosco A, McKenna KL, Wikstrom ME, et al. Interactions between innate antiviral and atopic immunoinflammatory pathways precipitate

and sustain asthma exacerbations in children. *Journal of immunology* (Baltimore, Md : 1950). 2009;183(4):2793-800.

26. Huber JP, Ramos HJ, Gill MA, Farrar JD. Cutting edge: Type I IFN reverses human Th2 commitment and stability by suppressing GATA3. *Journal of immunology* (Baltimore, Md : 1950). 2010;185(2):813-7.

27. Huber JP, Gonzales-van Horn SR, Roybal KT, Gill MA, Farrar JD. IFN- $\alpha$  suppresses GATA3 transcription from a distal exon and promotes H3K27 trimethylation of the CNS-1 enhancer in human Th2 cells. *Journal of immunology* (Baltimore, Md : 1950). 2014;192(12):5687-94.

28. Tversky JR, Bieneman AP, Chichester KL, Hamilton RG, Schroeder JT. Subcutaneous allergen immunotherapy restores human dendritic cell innate immune function. *Clin Exp Allergy*. 2010;40(1):94-102.

29. O'Mahony L, Akdis CA, Eiwegger T. Innate mechanisms can predict successful allergy immunotherapy. *J Allergy Clin Immunol*. 2016;137(2):559-61.

30. Gueguen C, Bouley J, Moussu H, Luce S, Duchateau M, Chamot-Rooke J, et al. Changes in markers associated with dendritic cells driving the differentiation of either TH2 cells or regulatory T cells correlate with clinical benefit during allergen immunotherapy. *J Allergy Clin Immunol*. 2016;137(2):545-58.

31. White OJ, McKenna KL, Bosco A, van den Biggelaar AHJ, Richmond P, Holt PG. A genomics-based approach to assessment of vaccine safety and immunogenicity in children. *Vaccine*. 2012;30:1865-74.

32. Ryan EJ, Nilsson L, Kjellman N, Gothefors L, Mills KH. Booster immunization of children with an acellular pertussis vaccine enhances Th2 cytokine production and serum IgE responses against pertussis toxin but not against common allergens. *Clin Exp Immunol*. 2000;121(2):193-200.

## FIGURE LEGENDS

### **Figure 1. Evolution of symptoms over time during SCIT.**

Normalised respiratory symptom scores were plotted (as mean  $\pm$  95%CI) for pre-(V1) and post-SCIT treatment (V2, V4, V5 and V6) sampling points.

### **Figure 2. CD4+ T-cell immune responses pre-treatment (V1) were correlated with respiratory symptoms.**

A) Volcano plot showing HDM-specific DEG at V1 (dashed horizontal line=adjusted  $p$ -value<0.05, red=upregulated genes, blue=downregulated genes). B) Pathways analysis of DEG was carried out with InnateDB (red=upregulated pathways, blue=downregulated pathways). C) Predicted upstream regulators of the DEG (red=activated drivers, blue=inhibited drivers). D) Correlation of respiratory symptoms with CD4+T cell responses at V1; E) corresponding up-and-downregulated pathways and F) upstream regulators.

### **Figure 3. CD4+ T-cell responses over the course of SCIT treatment (V2, V4 and V5).**

A) Volcano plots showing HDM-specific CD4+ T-cell responses at V2, V4 and V5 respectively. The dashed horizontal line indicates an adjusted  $p$ -value<0.05. Upregulated genes are denoted in red, downregulated genes are denoted in blue. B) Pathways analysis of DEG was carried out with InnateDB (red=upregulated pathways, blue=downregulated pathways). C) Predicted upstream regulators of the DEG (red=activated drivers, blue= inhibited drivers).

### **Figure 4. Network analysis of the HDM-induced T cell responses.**

Co-expression networks were constructed employing *WGCNA*. A) Network connectivity patterns(V2/V4/V5) were superimposed over V1 modular architecture. B) Comparison of V1

modular architecture with the module assignments V2/V4/V5 (left panel). Roadmap showing progressive re-wiring of the modules (A-N) over the course of SCIT(right panel; black circles/lines=differentially expressed, grey=not differentially expressed. C) Box-and-whisker plots showing modules with DEG. Median adjusted *p-values*: \*=0.05, \*\*=0.01, \*\*\*=0.001, \*\*\*\*=0.0001.

**Figure 5. Reconstruction of the network wiring diagram at V1/V5 reveals changes in network connectivity.**

Co-expression networks were constructed employing *WGCNA* and visualised in Cytoscape. The top-800 network edges/pairwise connections were utilised for network reconstruction. The node size reflects the number of connections per gene. Node colour spectrum in key (red-blue) designates positive-to-negative log2FC; note module A is not upregulated until V5.

**Supplementary Figure E1. SCIT treatment/sample collection schedule.**

Treatment included a 15-week up dosing (up to 100,000 SQ-U) and a 2-year maintenance with injection intervals of 6±2 weeks, and patients recorded daily symptoms and medication use, the details of which were utilised to generate symptom scores at the end of designated treatment periods.

**Supplementary Figure E2. Serum titres of HDM-specific IgE and IgG4.**

House dust mite specific (*Dermatophagoides pteronyssinus*) antibody levels were detected by ImmunoCAP, measuring in A) *HDM*- specific IgE and in B) HDM-specific IgG4-specific.

**Supplementary Figure E3. Comparison of expression ranks and connectivity ranks at V1 versus subsequent visits.**

#### **Supplementary Figure E4. Reconstruction of the network wiring diagram at V2/V4.**

Co-expression networks were constructed employing *WGCNA* and the top-800 pairwise (gene-gene) connections (extracted from the adjacency matrix) were utilised to reconstruct the network wiring diagram of modules A, F, G and I at V2 and V4 utilising Cytoscape, as per Figure 5. Node colour spectrum in key (red-blue) designates positive-to-negative log<sub>2</sub>FC.

**Table I. Activation Z-scores at each visit for the V5 upstream drivers.**

| Upstream regulators      | V1    | V2    | V4    | V5          |
|--------------------------|-------|-------|-------|-------------|
| NFkB (complex)           | 5.80  | 5.85  | 5.84  | 7.05        |
| IL1B                     | 6.08  | 5.80  | 5.87  | 6.87        |
| CD40LG                   | 5.74  | 5.94  | 6.04  | 6.50        |
| TCR (complex)            | 6.66  | 5.85  | 6.61  | 6.28        |
| IL2                      | 6.79  | 6.66  | 6.69  | 6.20        |
| IL7                      | 5.32  | 5.78  | 5.27  | 6.14        |
| TNF                      | 5.58  | 5.12  | 5.32  | 6.10        |
| MYC                      | 5.97  | 5.75  | 6.36  | 6.07        |
| <b>IFNA2</b>             | 1.65  | 1.79  | 0.55  | <b>5.99</b> |
| <b>IRF7</b>              | 0.60  | 1.95  | -0.16 | <b>5.85</b> |
| <b>IFNG</b>              | 3.48  | 3.93  | 2.60  | <b>5.78</b> |
| <b>IFNA group</b>        | 2.92  | 3.36  | 2.21  | <b>5.63</b> |
| TLR4                     | 4.71  | 4.80  | 4.11  | 5.62        |
| IL15                     | 5.24  | 5.29  | 5.62  | 5.54        |
| MYCN                     | 4.02  | 4.41  | 4.65  | 5.35        |
| TLR9                     | 4.76  | 4.69  | 3.81  | 5.00        |
| <b>STAT1</b>             | 2.27  | 3.04  | 1.86  | <b>4.87</b> |
| IL18                     | 4.53  | 4.56  | 4.46  | 4.78        |
| CSF2                     | 4.71  | 4.12  | 4.32  | 4.25        |
| IL5                      | 4.22  | 4.15  | 4.17  | 4.02        |
| Immunoglobulin (complex) | 2.85  | 3.37  | 3.71  | 3.96        |
| CD3 (complex)            | 3.52  | 3.62  | 3.68  | 3.96        |
| IL3                      | 3.67  | 3.63  | 3.39  | 3.86        |
| STAT3                    | 3.32  | 3.37  | 3.04  | 2.65        |
| IL27                     | 1.96  | 1.79  | 1.00  | 2.28        |
| IL4                      | 2.49  | 2.44  | 2.53  | 2.19        |
| IL10                     | -2.23 | -2.48 | -2.81 | -2.85       |
| CD28                     | -5.38 | -4.97 | -5.14 | -4.49       |
| BCL6                     | -4.91 | -4.93 | -4.82 | -4.94       |
| RICTOR                   | -3.64 | -4.95 | -4.35 | -5.14       |

Putative regulators of the DEG were identified at each visit employing Ingenuity Systems Upstream Regulator Analysis. Molecular drivers with Benjamini & Hochberg adjusted *P-values* ≤ 0.05 and absolute *Z-scores* ≥ 2.0 were deemed significant (positive *Z-scores*=activation, negative *Z-scores*=inhibition).



## Supplementary Tables E1-7

### Rewiring of Th-memory-associated gene co-expression networks underlie immunotherapy-induced changes in symptom expression in mite-sensitised atopics

#### Authors

Anya C. Jones PhD<sup>1</sup>, Denise Anderson MBIostat<sup>1</sup>, Niamh M. Troy BSc<sup>1,2</sup>, Dominic Mallon MBBS<sup>4</sup>, Rochelle Hartmann RN<sup>4</sup>, Michael Serralha BSc<sup>1</sup>, Barbara Holt BSc<sup>1</sup>, Anthony Bosco PhD<sup>1,#</sup>, Patrick G. Holt DSc<sup>1,3,#</sup>

#### Affiliations

<sup>1</sup>*Telethon Kids Institute, The University of Western Australia.*

<sup>2</sup>*School of Medicine, The University of Western Australia, Perth, Australia.*

<sup>3</sup>*Child Health Research Centre, The University of Queensland, Brisbane, Australia.*

<sup>4</sup>*Dept of Clinical Immunology, Fiona Stanley Hospital, Perth, Australia*

<sup>#</sup>Joint senior authors.

## Supplementary Table E1. Subject characteristics at recruitment.

### Subject characteristics (n=25)

|                             |                |
|-----------------------------|----------------|
| Age in years (median/range) | 28.9 (19-56.8) |
| Female (%)                  | 80             |
| Current rhinitis (%)        | 100            |
| Current wheeze (%)          | 56             |
| HDM sensitised (%)          | 100            |
| Grass sensitised (%)        | 72             |

**Supplementary Table E2. Top 100 differentially expressed genes (up/down) in CD4+ T cells prior to SCIT (V1).**

| ProbeID   | EntrezID | Symbol   | logFC | AveExpr | t     | P.Value  | adj.P.Val | B     |
|-----------|----------|----------|-------|---------|-------|----------|-----------|-------|
| 6347_at   | 6347     | CCL2     | 3.62  | 7.76    | 11.58 | 2.08E-22 | 1.18E-20  | 40.30 |
| 6354_at   | 6354     | CCL7     | 3.37  | 6.62    | 11.96 | 2.11E-23 | 1.32E-21  | 42.57 |
| 5055_at   | 5055     | SERPINB2 | 3.24  | 7.42    | 12.15 | 6.40E-24 | 4.45E-22  | 43.75 |
| 3553_at   | 3553     | IL1B     | 3.00  | 8.34    | 10.60 | 7.82E-20 | 2.97E-18  | 34.43 |
| 6374_at   | 6374     | CXCL5    | 2.75  | 10.79   | 11.70 | 9.83E-23 | 5.73E-21  | 41.05 |
| 2919_at   | 2919     | CXCL1    | 2.26  | 7.97    | 10.16 | 1.15E-18 | 3.45E-17  | 31.77 |
| 2921_at   | 2921     | CXCL3    | 2.26  | 6.43    | 10.50 | 1.50E-19 | 5.11E-18  | 33.79 |
| 1154_at   | 1154     | CISH     | 2.10  | 7.68    | 15.19 | 7.66E-32 | 3.12E-29  | 61.82 |
| 3552_at   | 3552     | IL1A     | 2.06  | 5.66    | 8.32  | 5.56E-14 | 7.25E-13  | 21.11 |
| 3558_at   | 3558     | IL2      | 2.04  | 4.57    | 12.33 | 2.13E-24 | 1.55E-22  | 44.84 |
| 2791_at   | 2791     | GNG11    | 1.70  | 5.78    | 9.30  | 1.89E-16 | 3.95E-15  | 26.73 |
| 4316_at   | 4316     | MMP7     | 1.66  | 5.60    | 9.02  | 1.01E-15 | 1.82E-14  | 25.07 |
| 3559_at   | 3559     | IL2RA    | 1.65  | 6.83    | 14.84 | 6.05E-31 | 1.57E-28  | 59.78 |
| 4495_at   | 4495     | MT1G     | 1.63  | 7.62    | 8.10  | 1.97E-13 | 2.32E-12  | 19.87 |
| 3576_at   | 3576     | CXCL8    | 1.59  | 9.94    | 8.17  | 1.37E-13 | 1.68E-12  | 20.22 |
| 6372_at   | 6372     | CXCL6    | 1.58  | 3.96    | 6.86  | 1.78E-10 | 1.32E-09  | 13.17 |
| 8835_at   | 8835     | SOCS2    | 1.56  | 5.65    | 10.86 | 1.65E-20 | 6.73E-19  | 35.97 |
| 55022_at  | 55022    | PID1     | 1.48  | 6.03    | 8.19  | 1.20E-13 | 1.48E-12  | 20.36 |
| 54602_at  | 54602    | NDFIP2   | 1.43  | 4.93    | 8.55  | 1.50E-14 | 2.29E-13  | 22.41 |
| 718_at    | 718      | C3       | 1.38  | 5.54    | 9.33  | 1.57E-16 | 3.33E-15  | 26.91 |
| 4496_at   | 4496     | MT1H     | 1.35  | 7.64    | 7.64  | 2.60E-12 | 2.53E-11  | 17.33 |
| 6364_at   | 6364     | CCL20    | 1.33  | 6.61    | 8.68  | 7.32E-15 | 1.17E-13  | 23.11 |
| 6348_at   | 6348     | CCL3     | 1.32  | 7.63    | 6.16  | 6.76E-09 | 4.03E-08  | 9.61  |
| 79413_at  | 79413    | ZBED2    | 1.32  | 4.70    | 10.73 | 3.59E-20 | 1.43E-18  | 35.20 |
| 51339_at  | 51339    | DACT1    | 1.31  | 6.09    | 7.17  | 3.41E-11 | 2.76E-10  | 14.79 |
| 3578_at   | 3578     | IL9      | 1.31  | 4.31    | 4.47  | 1.59E-05 | 5.63E-05  | 2.09  |
| 2920_at   | 2920     | CXCL2    | 1.29  | 8.02    | 6.89  | 1.58E-10 | 1.18E-09  | 13.29 |
| 7980_at   | 7980     | TFPI2    | 1.28  | 4.41    | 8.14  | 1.62E-13 | 1.97E-12  | 20.06 |
| 6367_at   | 6367     | CCL22    | 1.26  | 9.06    | 10.68 | 5.00E-20 | 1.94E-18  | 34.87 |
| 8651_at   | 8651     | SOCS1    | 1.22  | 6.17    | 13.59 | 1.04E-27 | 1.26E-25  | 52.40 |
| 5473_at   | 5473     | PPBP     | 1.16  | 12.17   | 6.49  | 1.25E-09 | 8.24E-09  | 11.26 |
| 199675_at | 199675   | MCEMP1   | 1.11  | 6.65    | 7.62  | 2.89E-12 | 2.77E-11  | 17.22 |
| 3002_at   | 3002     | GZMB     | 1.09  | 6.84    | 5.67  | 7.27E-08 | 3.74E-07  | 7.30  |
| 170691_at | 170691   | ADAMTS17 | 1.09  | 5.21    | 13.45 | 2.46E-27 | 2.59E-25  | 51.54 |
| 84830_at  | 84830    | ADTRP    | 1.08  | 6.19    | 13.54 | 1.46E-27 | 1.70E-25  | 52.06 |
| 1462_at   | 1462     | VCAN     | 1.05  | 4.05    | 7.45  | 7.34E-12 | 6.62E-11  | 16.30 |
| 6447_at   | 6447     | SCG5     | 1.05  | 5.08    | 7.00  | 8.69E-11 | 6.74E-10  | 13.88 |
| 114801_at | 114801   | TMEM200A | 1.03  | 4.99    | 10.16 | 1.13E-18 | 3.42E-17  | 31.79 |
| 5732_at   | 5732     | PTGER2   | 1.03  | 8.32    | 9.13  | 5.07E-16 | 9.74E-15  | 25.75 |

| ProbeID   | EntrezID | Symbol     | logFC | AveExpr | t      | P.Value  | adj.P.Val | B     |
|-----------|----------|------------|-------|---------|--------|----------|-----------|-------|
| 3557_at   | 3557     | IL1RN      | 1.02  | 6.94    | 5.65   | 8.33E-08 | 4.23E-07  | 7.17  |
| 5292_at   | 5292     | PIM1       | 1.02  | 8.90    | 17.87  | 1.40E-38 | 4.58E-35  | 77.17 |
| 4603_at   | 4603     | MYBL1      | 0.98  | 8.36    | 9.27   | 2.26E-16 | 4.67E-15  | 26.55 |
| 705_at    | 705      | BYSL       | 0.98  | 6.53    | 14.38  | 9.35E-30 | 1.70E-27  | 57.06 |
| 1847_at   | 1847     | DUSP5      | 0.96  | 7.01    | 8.47   | 2.35E-14 | 3.44E-13  | 21.96 |
| 3562_at   | 3562     | IL3        | 0.95  | 3.28    | 4.63   | 8.01E-06 | 3.01E-05  | 2.75  |
| 10148_at  | 10148    | EBI3       | 0.95  | 5.53    | 9.21   | 3.26E-16 | 6.57E-15  | 26.19 |
| 6351_at   | 6351     | CCL4       | 0.94  | 9.19    | 5.54   | 1.39E-07 | 6.91E-07  | 6.67  |
| 27074_at  | 27074    | LAMP3      | 0.94  | 6.31    | 7.31   | 1.60E-11 | 1.36E-10  | 15.54 |
| 25902_at  | 25902    | MTHFD1L    | 0.94  | 7.03    | 17.58  | 7.26E-38 | 1.18E-34  | 75.55 |
| 645784_at | 645784   | ANKRD36BP2 | 0.93  | 5.12    | 4.77   | 4.36E-06 | 1.70E-05  | 3.34  |
| 22797_at  | 22797    | TFEC       | -0.76 | 5.45    | -6.10  | 9.19E-09 | 5.38E-08  | 9.31  |
| 5836_at   | 5836     | PYGL       | -0.78 | 5.39    | -5.79  | 4.09E-08 | 2.20E-07  | 7.86  |
| 1675_at   | 1675     | CFD        | -0.79 | 4.75    | -8.58  | 1.26E-14 | 1.95E-13  | 22.58 |
| 3597_at   | 3597     | IL13RA1    | -0.80 | 5.44    | -6.34  | 2.70E-09 | 1.69E-08  | 10.51 |
| 7305_at   | 7305     | TYROBP     | -0.81 | 10.08   | -5.71  | 6.15E-08 | 3.23E-07  | 7.46  |
| 51313_at  | 51313    | FAM198B    | -0.81 | 3.58    | -9.82  | 8.77E-18 | 2.31E-16  | 29.76 |
| 7850_at   | 7850     | IL1R2      | -0.82 | 6.73    | -4.19  | 4.84E-05 | 1.58E-04  | 1.03  |
| 2681_at   | 2681     | GGTA1P     | -0.82 | 3.58    | -8.60  | 1.13E-14 | 1.77E-13  | 22.68 |
| 4286_at   | 4286     | MITF       | -0.83 | 6.07    | -7.46  | 7.21E-12 | 6.52E-11  | 16.32 |
| 6614_at   | 6614     | SIGLEC1    | -0.83 | 5.61    | -6.01  | 1.43E-08 | 8.23E-08  | 8.88  |
| 54674_at  | 54674    | LRRN3      | -0.84 | 10.54   | -6.59  | 7.51E-10 | 5.07E-09  | 11.76 |
| 1536_at   | 1536     | CYBB       | -0.84 | 7.54    | -5.92  | 2.26E-08 | 1.27E-07  | 8.44  |
| 10288_at  | 10288    | LILRB2     | -0.87 | 6.24    | -4.81  | 3.68E-06 | 1.45E-05  | 3.50  |
| 10410_at  | 10410    | IFITM3     | -0.88 | 6.59    | -4.94  | 2.10E-06 | 8.58E-06  | 4.04  |
| 928_at    | 928      | CD9        | -0.88 | 8.26    | -7.62  | 2.90E-12 | 2.77E-11  | 17.22 |
| 2359_at   | 2359     | FPR3       | -0.89 | 6.59    | -6.02  | 1.35E-08 | 7.79E-08  | 8.94  |
| 120892_at | 120892   | LRRK2      | -0.89 | 5.13    | -7.94  | 4.87E-13 | 5.39E-12  | 18.98 |
| 7941_at   | 7941     | PLA2G7     | -0.90 | 8.92    | -5.67  | 7.43E-08 | 3.82E-07  | 7.28  |
| 1050_at   | 1050     | CEBPA      | -0.90 | 6.74    | -7.78  | 1.24E-12 | 1.28E-11  | 18.06 |
| 6252_at   | 6252     | RTN1       | -0.90 | 5.83    | -8.78  | 4.02E-15 | 6.72E-14  | 23.71 |
| 3109_at   | 3109     | HLA-DMB    | -0.91 | 6.84    | -9.02  | 9.85E-16 | 1.80E-14  | 25.10 |
| 84417_at  | 84417    | C2orf40    | -0.92 | 6.13    | -10.28 | 5.48E-19 | 1.74E-17  | 32.50 |
| 6369_at   | 6369     | CCL24      | -0.96 | 9.65    | -5.30  | 4.15E-07 | 1.91E-06  | 5.61  |
| 2662_at   | 2662     | GDF10      | -0.97 | 3.92    | -10.50 | 1.50E-19 | 5.11E-18  | 33.78 |
| 5166_at   | 5166     | PDK4       | -0.99 | 4.20    | -9.85  | 7.30E-18 | 1.95E-16  | 29.94 |
| 54209_at  | 54209    | TREM2      | -1.00 | 5.13    | -9.25  | 2.49E-16 | 5.09E-15  | 26.45 |
| 3627_at   | 3627     | CXCL10     | -1.00 | 5.05    | -3.54  | 5.41E-04 | 1.44E-03  | -1.25 |
| 1823_at   | 1823     | DSC1       | -1.02 | 5.50    | -9.49  | 6.18E-17 | 1.39E-15  | 27.83 |
| 6039_at   | 6039     | RNASE6     | -1.03 | 6.97    | -7.77  | 1.29E-12 | 1.32E-11  | 18.02 |
| 54_at     | 54       | ACP5       | -1.05 | 8.58    | -10.43 | 2.27E-19 | 7.35E-18  | 33.37 |
| 200315_at | 200315   | APOBEC3A   | -1.07 | 4.78    | -4.93  | 2.24E-06 | 9.10E-06  | 3.98  |

| ProbeID  | EntrezID | Symbol  | logFC | AveExpr | t      | P.Value  | adj.P.Val | B     |
|----------|----------|---------|-------|---------|--------|----------|-----------|-------|
| 2214_at  | 2214     | FCGR3A  | -1.08 | 5.99    | -4.63  | 8.01E-06 | 3.01E-05  | 2.75  |
| 26253_at | 26253    | CLEC4E  | -1.10 | 6.17    | -8.86  | 2.53E-15 | 4.28E-14  | 24.16 |
| 55016_at | 55016    | MARCH1  | -1.11 | 4.41    | -10.22 | 8.06E-19 | 2.48E-17  | 32.12 |
| 2219_at  | 2219     | FCN1    | -1.17 | 5.88    | -6.82  | 2.28E-10 | 1.66E-09  | 12.93 |
| 51311_at | 51311    | TLR8    | -1.17 | 5.23    | -8.13  | 1.66E-13 | 2.01E-12  | 20.04 |
| 10170_at | 10170    | DHRS9   | -1.18 | 5.56    | -10.58 | 9.06E-20 | 3.36E-18  | 34.29 |
| 216_at   | 216      | ALDH1A1 | -1.19 | 3.62    | -10.54 | 1.14E-19 | 4.04E-18  | 34.06 |
| 4069_at  | 4069     | LYZ     | -1.25 | 10.88   | -8.21  | 1.07E-13 | 1.34E-12  | 20.47 |
| 10457_at | 10457    | GPNMB   | -1.30 | 6.47    | -7.86  | 7.55E-13 | 8.05E-12  | 18.54 |
| 54504_at | 54504    | CPVL    | -1.30 | 3.93    | -8.96  | 1.38E-15 | 2.43E-14  | 24.76 |
| 4332_at  | 4332     | MNDA    | -1.43 | 5.49    | -7.97  | 4.06E-13 | 4.56E-12  | 19.15 |
| 2167_at  | 2167     | FABP4   | -1.48 | 6.90    | -7.22  | 2.62E-11 | 2.14E-10  | 15.05 |
| 4199_at  | 4199     | ME1     | -1.58 | 5.39    | -12.55 | 5.64E-25 | 4.38E-23  | 46.16 |
| 3957_at  | 3957     | LGALS2  | -1.59 | 5.49    | -5.83  | 3.50E-08 | 1.89E-07  | 8.01  |
| 948_at   | 948      | CD36    | -1.61 | 5.46    | -10.60 | 8.18E-20 | 3.07E-18  | 34.39 |
| 10875_at | 10875    | FGL2    | -1.61 | 8.18    | -10.34 | 3.91E-19 | 1.25E-17  | 32.84 |
| 7045_at  | 7045     | TGFBI   | -1.65 | 7.64    | -9.80  | 9.90E-18 | 2.59E-16  | 29.64 |
| 6035_at  | 6035     | RNASE1  | -1.86 | 6.30    | -9.10  | 6.03E-16 | 1.14E-14  | 25.58 |
| 79887_at | 79887    | PLBD1   | -2.07 | 6.48    | -14.53 | 3.83E-30 | 7.82E-28  | 57.95 |

Differentially expressed genes were identified with *limma* contrasting HDM versus CTRL in CD4+ T cells prior to SCIT (V1). ProbeID = , EntrezID = , logFC = log base 2 fold change, AveExpr = average log2-expression level for that gene across all the arrays, t = moderated t-statistic, P.value = the associated p-value, adj.P.Val = the Benjamini & Hochberg adjusted P.value for multiple testing, B = the B-statistic is the log-odds that the gene is differentially expressed.

### Supplementary Table E3. Association of respiratory symptoms with gene expression prior to SCIT (V1).

| ProbeID   | EntrezID | Symbol   | logFC | AveExpr | t    | P.Value  | adj.P.Val | B     |
|-----------|----------|----------|-------|---------|------|----------|-----------|-------|
| 3578_at   | 3578     | IL9      | 0.11  | 4.06    | 5.86 | 4.32E-07 | 5.83E-04  | 4.94  |
| 3567_at   | 3567     | IL5      | 0.07  | 3.33    | 4.64 | 2.73E-05 | 3.82E-03  | 0.85  |
| 386653_at | 386653   | IL31     | 0.07  | 3.70    | 5.51 | 1.46E-06 | 7.93E-04  | 3.74  |
| 54602_at  | 54602    | NDFIP2   | 0.06  | 4.88    | 4.79 | 1.67E-05 | 3.59E-03  | 1.33  |
| 3596_at   | 3596     | IL13     | 0.05  | 4.59    | 5.10 | 5.87E-06 | 1.90E-03  | 2.36  |
| 3458_at   | 3458     | IFNG     | 0.05  | 4.45    | 4.59 | 3.30E-05 | 4.14E-03  | 0.67  |
| 3002_at   | 3002     | GZMB     | 0.05  | 6.61    | 3.52 | 9.64E-04 | 3.50E-02  | -2.60 |
| 1154_at   | 1154     | CISH     | 0.04  | 7.50    | 3.69 | 5.74E-04 | 2.57E-02  | -2.10 |
| 3566_at   | 3566     | IL4R     | 0.04  | 7.30    | 3.76 | 4.61E-04 | 2.24E-02  | -1.89 |
| 5996_at   | 5996     | RGS1     | 0.04  | 7.94    | 4.70 | 2.27E-05 | 3.59E-03  | 1.03  |
| 387496_at | 387496   | RASL11A  | 0.04  | 4.24    | 4.09 | 1.64E-04 | 1.37E-02  | -0.90 |
| 8651_at   | 8651     | SOCS1    | 0.04  | 6.05    | 6.04 | 2.23E-07 | 5.83E-04  | 5.60  |
| 7293_at   | 7293     | TNFRSF4  | 0.04  | 6.86    | 4.62 | 2.92E-05 | 3.82E-03  | 0.79  |
| 55509_at  | 55509    | BATF3    | 0.03  | 5.51    | 4.72 | 2.10E-05 | 3.59E-03  | 1.11  |
| 5732_at   | 5732     | PTGER2   | 0.03  | 8.25    | 3.48 | 1.09E-03 | 3.69E-02  | -2.72 |
| 115362_at | 115362   | GBP5     | 0.03  | 8.94    | 3.62 | 7.15E-04 | 2.92E-02  | -2.31 |
| 84255_at  | 84255    | SLC37A3  | 0.03  | 6.28    | 5.11 | 5.73E-06 | 1.90E-03  | 2.39  |
| 3642_at   | 3642     | INSM1    | 0.03  | 3.43    | 3.73 | 5.10E-04 | 2.41E-02  | -1.99 |
| 4783_at   | 4783     | NFIL3    | 0.03  | 6.21    | 4.69 | 2.31E-05 | 3.59E-03  | 1.02  |
| 3559_at   | 3559     | IL2RA    | 0.03  | 6.80    | 3.75 | 4.82E-04 | 2.32E-02  | -1.94 |
| 817_at    | 817      | CAMK2D   | 0.03  | 7.35    | 3.82 | 3.83E-04 | 2.05E-02  | -1.71 |
| 2672_at   | 2672     | GFI1     | 0.03  | 7.45    | 4.16 | 1.32E-04 | 1.17E-02  | -0.69 |
| 27314_at  | 27314    | RAB30    | 0.03  | 5.40    | 5.08 | 6.39E-06 | 1.90E-03  | 2.28  |
| 170691_at | 170691   | ADAMTS17 | 0.02  | 5.24    | 3.87 | 3.32E-04 | 1.86E-02  | -1.58 |
| 94120_at  | 94120    | SYTL3    | 0.02  | 6.68    | 3.77 | 4.51E-04 | 2.23E-02  | -1.87 |
| 3565_at   | 3565     | IL4      | 0.02  | 3.73    | 3.58 | 7.93E-04 | 3.12E-02  | -2.41 |
| 197370_at | 197370   | NSMCE1   | 0.02  | 9.45    | 4.29 | 8.65E-05 | 9.11E-03  | -0.27 |
| 3662_at   | 3662     | IRF4     | 0.02  | 6.36    | 5.36 | 2.44E-06 | 1.14E-03  | 3.23  |
| 64859_at  | 64859    | NABP1    | 0.02  | 7.82    | 5.57 | 1.17E-06 | 7.63E-04  | 3.96  |
| 4118_at   | 4118     | MAL      | 0.02  | 10.93   | 3.59 | 7.79E-04 | 3.10E-02  | -2.40 |
| 115361_at | 115361   | GBP4     | 0.02  | 6.97    | 3.47 | 1.11E-03 | 3.69E-02  | -2.74 |
| 3659_at   | 3659     | IRF1     | 0.02  | 9.00    | 3.47 | 1.12E-03 | 3.69E-02  | -2.74 |
| 1803_at   | 1803     | DPP4     | 0.02  | 8.90    | 4.02 | 2.05E-04 | 1.49E-02  | -1.11 |
| 7494_at   | 7494     | XBP1     | 0.02  | 9.20    | 3.98 | 2.37E-04 | 1.54E-02  | -1.25 |
| 604_at    | 604      | BCL6     | 0.02  | 8.05    | 4.43 | 5.49E-05 | 6.17E-03  | 0.17  |
| 6875_at   | 6875     | TAF4B    | 0.02  | 6.89    | 4.89 | 1.21E-05 | 3.30E-03  | 1.65  |
| 355_at    | 355      | FAS      | 0.02  | 7.76    | 4.41 | 5.98E-05 | 6.51E-03  | 0.09  |
| 6004_at   | 6004     | RGS16    | 0.02  | 4.34    | 3.67 | 6.22E-04 | 2.61E-02  | -2.18 |
| 6361_at   | 6361     | CCL17    | 0.02  | 6.26    | 4.11 | 1.55E-04 | 1.34E-02  | -0.84 |

| ProbeID   | EntrezID | Symbol   | logFC | AveExpr | t    | P.Value  | adj.P.Val | B     |
|-----------|----------|----------|-------|---------|------|----------|-----------|-------|
| 83939_at  | 83939    | EIF2A    | 0.02  | 6.55    | 4.03 | 2.03E-04 | 1.49E-02  | -1.10 |
| 50616_at  | 50616    | IL22     | 0.02  | 4.56    | 3.78 | 4.41E-04 | 2.21E-02  | -1.85 |
| 6641_at   | 6641     | SNTB1    | 0.02  | 6.34    | 4.21 | 1.13E-04 | 1.06E-02  | -0.54 |
| 494143_at | 494143   | CHAC2    | 0.02  | 6.37    | 3.36 | 1.56E-03 | 4.72E-02  | -3.06 |
| 10906_at  | 10906    | TRAFFD1  | 0.02  | 7.23    | 5.26 | 3.45E-06 | 1.41E-03  | 2.89  |
| 10797_at  | 10797    | MTHFD2   | 0.02  | 8.84    | 4.65 | 2.67E-05 | 3.82E-03  | 0.88  |
| 3628_at   | 3628     | INPP1    | 0.02  | 6.92    | 3.73 | 5.16E-04 | 2.41E-02  | -2.00 |
| 9246_at   | 9246     | UBE2L6   | 0.02  | 10.17   | 3.40 | 1.37E-03 | 4.25E-02  | -2.93 |
| 8809_at   | 8809     | IL18R1   | 0.02  | 5.96    | 3.46 | 1.14E-03 | 3.72E-02  | -2.76 |
| 10538_at  | 10538    | BATF     | 0.02  | 8.30    | 4.02 | 2.05E-04 | 1.49E-02  | -1.11 |
| 64332_at  | 64332    | NFKBIZ   | 0.01  | 10.35   | 4.22 | 1.11E-04 | 1.06E-02  | -0.51 |
| 6890_at   | 6890     | TAP1     | 0.01  | 10.08   | 3.67 | 6.08E-04 | 2.61E-02  | -2.16 |
| 10308_at  | 10308    | ZNF267   | 0.01  | 8.64    | 3.98 | 2.32E-04 | 1.54E-02  | -1.23 |
| 10653_at  | 10653    | SPINT2   | 0.01  | 8.68    | 3.99 | 2.29E-04 | 1.54E-02  | -1.22 |
| 5971_at   | 5971     | RELB     | 0.01  | 7.98    | 3.55 | 8.86E-04 | 3.29E-02  | -2.52 |
| 4049_at   | 4049     | LTA      | 0.01  | 6.66    | 3.82 | 3.93E-04 | 2.07E-02  | -1.74 |
| 3560_at   | 3560     | IL2RB    | 0.01  | 9.95    | 3.40 | 1.36E-03 | 4.25E-02  | -2.93 |
| 23102_at  | 23102    | TBC1D2B  | 0.01  | 6.89    | 4.23 | 1.04E-04 | 1.03E-02  | -0.46 |
| 81671_at  | 81671    | VMP1     | 0.01  | 8.73    | 4.01 | 2.15E-04 | 1.53E-02  | -1.16 |
| 23212_at  | 23212    | RRS1     | 0.01  | 9.75    | 4.07 | 1.79E-04 | 1.41E-02  | -0.98 |
| 9262_at   | 9262     | STK17B   | 0.01  | 8.59    | 4.44 | 5.31E-05 | 6.17E-03  | 0.20  |
| 5292_at   | 5292     | PIM1     | 0.01  | 8.85    | 3.56 | 8.53E-04 | 3.24E-02  | -2.48 |
| 3702_at   | 3702     | ITK      | 0.01  | 9.18    | 5.72 | 6.94E-07 | 5.83E-04  | 4.48  |
| 5236_at   | 5236     | PGM1     | 0.01  | 7.65    | 4.19 | 1.19E-04 | 1.08E-02  | -0.58 |
| 5906_at   | 5906     | RAP1A    | 0.01  | 10.27   | 3.50 | 1.03E-03 | 3.69E-02  | -2.67 |
| 8611_at   | 8611     | PLPP1    | 0.01  | 7.56    | 4.07 | 1.75E-04 | 1.41E-02  | -0.96 |
| 836_at    | 836      | CASP3    | 0.01  | 7.32    | 3.95 | 2.58E-04 | 1.65E-02  | -1.33 |
| 2023_at   | 2023     | ENO1     | 0.01  | 12.30   | 3.67 | 6.22E-04 | 2.61E-02  | -2.18 |
| 10531_at  | 10531    | PITRM1   | 0.01  | 7.65    | 3.94 | 2.70E-04 | 1.65E-02  | -1.38 |
| 7702_at   | 7702     | ZNF143   | 0.01  | 7.63    | 4.57 | 3.44E-05 | 4.16E-03  | 0.63  |
| 1503_at   | 1503     | CTPS1    | 0.01  | 6.76    | 3.69 | 5.83E-04 | 2.57E-02  | -2.12 |
| 57559_at  | 57559    | STAMBPL1 | 0.01  | 8.70    | 4.26 | 9.68E-05 | 9.88E-03  | -0.38 |
| 6675_at   | 6675     | UAP1     | 0.01  | 7.95    | 4.63 | 2.81E-05 | 3.82E-03  | 0.82  |
| 1615_at   | 1615     | DARS     | 0.01  | 10.15   | 3.87 | 3.34E-04 | 1.86E-02  | -1.58 |
| 6993_at   | 6993     | DYNLT1   | 0.01  | 10.32   | 3.66 | 6.23E-04 | 2.61E-02  | -2.18 |
| 29851_at  | 29851    | ICOS     | 0.01  | 8.95    | 4.80 | 1.63E-05 | 3.59E-03  | 1.36  |
| 8509_at   | 8509     | NDST2    | 0.01  | 7.37    | 3.43 | 1.27E-03 | 4.05E-02  | -2.86 |
| 123920_at | 123920   | CMTM3    | 0.01  | 8.87    | 3.88 | 3.23E-04 | 1.86E-02  | -1.55 |
| 54552_at  | 54552    | GNL3L    | 0.01  | 8.68    | 3.49 | 1.06E-03 | 3.69E-02  | -2.69 |
| 9595_at   | 9595     | CYTIP    | 0.01  | 10.47   | 3.87 | 3.36E-04 | 1.86E-02  | -1.59 |
| 388962_at | 388962   | BOLA3    | 0.01  | 8.74    | 3.79 | 4.24E-04 | 2.16E-02  | -1.81 |
| 9188_at   | 9188     | DDX21    | 0.01  | 10.17   | 3.94 | 2.68E-04 | 1.65E-02  | -1.37 |

| ProbeID   | EntrezID | Symbol   | logFC | AveExpr | t     | P.Value  | adj.P.Val | B     |
|-----------|----------|----------|-------|---------|-------|----------|-----------|-------|
| 51602_at  | 51602    | NOP58    | 0.00  | 10.33   | 3.48  | 1.09E-03 | 3.69E-02  | -2.71 |
| 55863_at  | 55863    | TMEM126B | 0.00  | 10.27   | 3.70  | 5.56E-04 | 2.52E-02  | -2.07 |
| 3608_at   | 3608     | ILF2     | 0.00  | 10.44   | 3.61  | 7.38E-04 | 2.97E-02  | -2.34 |
| 6277_at   | 6277     | S100A6   | -0.01 | 11.92   | -3.81 | 4.04E-04 | 2.09E-02  | -1.77 |
| 51696_at  | 51696    | HECA     | -0.01 | 11.37   | -4.71 | 2.20E-05 | 3.59E-03  | 1.07  |
| 83442_at  | 83442    | SH3BGRL3 | -0.01 | 10.01   | -3.34 | 1.65E-03 | 4.94E-02  | -3.11 |
| 6281_at   | 6281     | S100A10  | -0.01 | 11.43   | -3.37 | 1.50E-03 | 4.59E-02  | -3.02 |
| 6653_at   | 6653     | SORL1    | -0.01 | 11.44   | -3.93 | 2.73E-04 | 1.65E-02  | -1.39 |
| 10365_at  | 10365    | KLF2     | -0.01 | 11.67   | -3.57 | 8.23E-04 | 3.16E-02  | -2.45 |
| 11329_at  | 11329    | STK38    | -0.01 | 11.07   | -3.71 | 5.38E-04 | 2.47E-02  | -2.04 |
| 6095_at   | 6095     | RORA     | -0.01 | 9.66    | -4.06 | 1.81E-04 | 1.41E-02  | -0.99 |
| 2533_at   | 2533     | FYB1     | -0.01 | 10.89   | -3.99 | 2.26E-04 | 1.54E-02  | -1.20 |
| 64968_at  | 64968    | MRPS6    | -0.01 | 11.35   | -3.55 | 8.74E-04 | 3.28E-02  | -2.51 |
| 27106_at  | 27106    | ARRDC2   | -0.01 | 9.65    | -3.48 | 1.07E-03 | 3.69E-02  | -2.70 |
| 6932_at   | 6932     | TCF7     | -0.01 | 8.50    | -3.37 | 1.49E-03 | 4.58E-02  | -3.01 |
| 51411_at  | 51411    | BIN2     | -0.01 | 8.56    | -3.43 | 1.24E-03 | 4.02E-02  | -2.84 |
| 79026_at  | 79026    | AHNAK    | -0.01 | 8.95    | -3.83 | 3.74E-04 | 2.03E-02  | -1.69 |
| 3987_at   | 3987     | LIMS1    | -0.01 | 10.26   | -3.65 | 6.48E-04 | 2.68E-02  | -2.22 |
| 28984_at  | 28984    | RGCC     | -0.01 | 11.66   | -4.72 | 2.10E-05 | 3.59E-03  | 1.11  |
| 1043_at   | 1043     | CD52     | -0.01 | 12.61   | -5.71 | 7.14E-07 | 5.83E-04  | 4.45  |
| 9214_at   | 9214     | FCMR     | -0.01 | 9.65    | -3.58 | 8.12E-04 | 3.16E-02  | -2.44 |
| 85478_at  | 85478    | CCDC65   | -0.01 | 7.04    | -3.40 | 1.36E-03 | 4.25E-02  | -2.93 |
| 26119_at  | 26119    | LDLRAP1  | -0.01 | 9.40    | -3.47 | 1.10E-03 | 3.69E-02  | -2.73 |
| 1831_at   | 1831     | TSC22D3  | -0.01 | 9.15    | -4.72 | 2.14E-05 | 3.59E-03  | 1.09  |
| 6526_at   | 6526     | SLC5A3   | -0.01 | 11.33   | -3.87 | 3.35E-04 | 1.86E-02  | -1.59 |
| 120224_at | 120224   | TMEM45B  | -0.01 | 6.91    | -3.49 | 1.04E-03 | 3.69E-02  | -2.68 |
| 3399_at   | 3399     | ID3      | -0.02 | 9.29    | -4.84 | 1.40E-05 | 3.51E-03  | 1.51  |
| 10457_at  | 10457    | GPNMB    | -0.04 | 6.81    | -3.54 | 9.08E-04 | 3.33E-02  | -2.54 |

We tested whether allergen-driven T-cell response patterns were associated with respiratory symptoms scores prior to SCIT (V1) employing *limma*. ProbeID = , EntrezID = , logFC = log base 2 fold change, AveExpr = average log2-expression level for that gene across all the arrays, t = moderated t-statistic, P.value = the associated p-value, adj.P.Val = the Benjamini & Hochberg adjusted P.value for multiple testing, B = the B-statistic is the log-odds that the gene is differentially expressed.



**Supplementary Table E4. Top 100 differentially expressed genes (up/down) in CD4+ T cells during SCIT (V2, 3.5mths).**

| ProbeID   | EntrezID | Symbol   | logFC | AveExpr | t     | P.Value  | adj.P.Val | B      |
|-----------|----------|----------|-------|---------|-------|----------|-----------|--------|
| 3553_at   | 3553     | IL1B     | 4.18  | 8.34    | 15.11 | 1.17E-31 | 3.56E-30  | 61.32  |
| 5055_at   | 5055     | SERPINB2 | 4.10  | 7.42    | 15.69 | 3.90E-33 | 1.45E-31  | 64.71  |
| 6347_at   | 6347     | CCL2     | 4.03  | 7.76    | 13.16 | 1.46E-26 | 2.31E-25  | 49.62  |
| 4316_at   | 4316     | MMP7     | 3.54  | 5.60    | 19.68 | 6.67E-43 | 8.37E-41  | 87.12  |
| 3552_at   | 3552     | IL1A     | 3.37  | 5.66    | 13.92 | 1.47E-28 | 2.86E-27  | 54.20  |
| 6374_at   | 6374     | CXCL5    | 3.28  | 10.79   | 14.22 | 2.38E-29 | 4.79E-28  | 56.02  |
| 2919_at   | 2919     | CXCL1    | 3.26  | 7.97    | 14.94 | 3.30E-31 | 9.06E-30  | 60.28  |
| 3558_at   | 3558     | IL2      | 3.18  | 4.57    | 19.64 | 8.38E-43 | 1.01E-40  | 86.89  |
| 1154_at   | 1154     | CISH     | 2.98  | 7.68    | 22.07 | 2.29E-48 | 7.49E-46  | 99.64  |
| 2921_at   | 2921     | CXCL3    | 2.91  | 6.43    | 13.79 | 3.15E-28 | 5.97E-27  | 53.44  |
| 6354_at   | 6354     | CCL7     | 2.89  | 6.62    | 10.47 | 1.70E-19 | 1.31E-18  | 33.42  |
| 8835_at   | 8835     | SOCS2    | 2.64  | 5.65    | 18.69 | 1.48E-40 | 1.34E-38  | 81.74  |
| 3578_at   | 3578     | IL9      | 2.59  | 4.31    | 8.98  | 1.22E-15 | 6.52E-15  | 24.61  |
| 3576_at   | 3576     | CXCL8    | 2.50  | 9.94    | 13.09 | 2.12E-26 | 3.32E-25  | 49.25  |
| 3559_at   | 3559     | IL2RA    | 2.35  | 6.83    | 21.57 | 2.98E-47 | 8.10E-45  | 97.09  |
| 54602_at  | 54602    | NDFIP2   | 2.34  | 4.93    | 14.31 | 1.42E-29 | 2.98E-28  | 56.53  |
| 6372_at   | 6372     | CXCL6    | 2.26  | 3.96    | 10.04 | 2.27E-18 | 1.57E-17  | 30.85  |
| 6364_at   | 6364     | CCL20    | 2.22  | 6.61    | 14.80 | 7.53E-31 | 1.92E-29  | 59.46  |
| 4312_at   | 4312     | MMP1     | 2.18  | 3.93    | 10.31 | 4.55E-19 | 3.37E-18  | 32.45  |
| 3620_at   | 3620     | IDO1     | 2.18  | 7.00    | 11.65 | 1.38E-22 | 1.42E-21  | 40.50  |
| 79413_at  | 79413    | ZBED2    | 2.17  | 4.70    | 18.09 | 4.22E-39 | 3.28E-37  | 78.40  |
| 6348_at   | 6348     | CCL3     | 2.15  | 7.63    | 10.25 | 6.48E-19 | 4.71E-18  | 32.09  |
| 51339_at  | 51339    | DACT1    | 1.99  | 6.09    | 11.08 | 4.39E-21 | 3.82E-20  | 37.06  |
| 3002_at   | 3002     | GZMB     | 1.96  | 6.84    | 10.40 | 2.69E-19 | 2.02E-18  | 32.97  |
| 3562_at   | 3562     | IL3      | 1.90  | 3.28    | 9.46  | 7.56E-17 | 4.51E-16  | 27.37  |
| 8651_at   | 8651     | SOCS1    | 1.85  | 6.17    | 21.04 | 4.88E-46 | 9.95E-44  | 94.31  |
| 114801_at | 114801   | TMEM200A | 1.78  | 4.99    | 17.81 | 1.98E-38 | 1.41E-36  | 76.86  |
| 6367_at   | 6367     | CCL22    | 1.77  | 9.06    | 15.35 | 2.95E-32 | 9.72E-31  | 62.69  |
| 7293_at   | 7293     | TNFRSF4  | 1.75  | 7.04    | 15.75 | 2.74E-33 | 1.08E-31  | 65.06  |
| 2920_at   | 2920     | CXCL2    | 1.70  | 8.02    | 9.29  | 2.02E-16 | 1.16E-15  | 26.39  |
| 10148_at  | 10148    | EBI3     | 1.68  | 5.53    | 16.68 | 1.27E-35 | 6.28E-34  | 70.41  |
| 1847_at   | 1847     | DUSP5    | 1.65  | 7.01    | 14.82 | 6.61E-31 | 1.71E-29  | 59.59  |
| 4495_at   | 4495     | MT1G     | 1.61  | 7.62    | 8.20  | 1.16E-13 | 5.32E-13  | 20.09  |
| 6363_at   | 6363     | CCL19    | 1.60  | 4.18    | 12.18 | 5.40E-24 | 6.30E-23  | 43.73  |
| 5732_at   | 5732     | PTGER2   | 1.59  | 8.32    | 14.38 | 8.97E-30 | 1.98E-28  | 56.99  |
| 27074_at  | 27074    | LAMP3    | 1.59  | 6.31    | 12.60 | 4.23E-25 | 5.57E-24  | 46.27  |
| 5996_at   | 5996     | RGS1     | 1.56  | 8.12    | 14.38 | 8.96E-30 | 1.98E-28  | 56.99  |
| 112744_at | 112744   | IL17F    | 1.53  | 4.61    | 10.50 | 1.47E-19 | 1.14E-18  | 33.57  |
| 705_at    | 705      | BYSL     | 1.53  | 6.53    | 22.78 | 6.33E-50 | 2.58E-47  | 103.22 |

| ProbeID   | EntrezID | Symbol   | logFC | AveExpr | t      | P.Value  | adj.P.Val | B      |
|-----------|----------|----------|-------|---------|--------|----------|-----------|--------|
| 6346_at   | 6346     | CCL1     | 1.45  | 5.36    | 11.14  | 2.99E-21 | 2.70E-20  | 37.44  |
| 2791_at   | 2791     | GNG11    | 1.45  | 5.78    | 8.09   | 2.16E-13 | 9.59E-13  | 19.48  |
| 50810_at  | 50810    | HDGFL3   | 1.44  | 6.47    | 13.50  | 1.78E-27 | 3.17E-26  | 51.72  |
| 8553_at   | 8553     | BHLHE40  | 1.43  | 7.04    | 16.62  | 1.73E-35 | 8.30E-34  | 70.11  |
| 3566_at   | 3566     | IL4R     | 1.42  | 7.40    | 12.54  | 5.99E-25 | 7.76E-24  | 45.92  |
| 10409_at  | 10409    | BASP1    | 1.42  | 7.65    | 12.85  | 9.23E-26 | 1.30E-24  | 47.78  |
| 3604_at   | 3604     | TNFRSF9  | 1.40  | 5.40    | 14.35  | 1.09E-29 | 2.38E-28  | 56.79  |
| 4603_at   | 4603     | MYBL1    | 1.40  | 8.36    | 13.49  | 1.97E-27 | 3.43E-26  | 51.62  |
| 5292_at   | 5292     | PIM1     | 1.39  | 8.90    | 25.00  | 1.31E-54 | 2.13E-51  | 113.94 |
| 414062_at | 414062   | CCL3L3   | 1.39  | 7.18    | 8.21   | 1.04E-13 | 4.82E-13  | 20.20  |
| 6004_at   | 6004     | RGS16    | 1.38  | 4.44    | 19.51  | 1.66E-42 | 1.94E-40  | 86.21  |
| 9332_at   | 9332     | CD163    | -1.09 | 4.99    | -4.36  | 2.46E-05 | 5.53E-05  | 1.32   |
| 3434_at   | 3434     | IFIT1    | -1.12 | 8.38    | -5.28  | 4.65E-07 | 1.25E-06  | 5.15   |
| 10437_at  | 10437    | IFI30    | -1.14 | 11.13   | -8.69  | 6.69E-15 | 3.37E-14  | 22.92  |
| 7850_at   | 7850     | IL1R2    | -1.14 | 6.73    | -5.93  | 2.05E-08 | 6.26E-08  | 8.20   |
| 5836_at   | 5836     | PYGL     | -1.15 | 5.39    | -8.71  | 5.95E-15 | 3.01E-14  | 23.04  |
| 200315_at | 200315   | APOBEC3A | -1.16 | 4.78    | -5.46  | 2.03E-07 | 5.64E-07  | 5.96   |
| 50856_at  | 50856    | CLEC4A   | -1.17 | 7.81    | -9.93  | 4.38E-18 | 2.95E-17  | 30.19  |
| 22797_at  | 22797    | TFEC     | -1.17 | 5.45    | -9.58  | 3.68E-17 | 2.26E-16  | 28.08  |
| 2517_at   | 2517     | FUCA1    | -1.17 | 7.69    | -13.95 | 1.23E-28 | 2.40E-27  | 54.38  |
| 55016_at  | 55016    | MARCH1   | -1.18 | 4.41    | -11.07 | 4.61E-21 | 4.00E-20  | 37.01  |
| 26509_at  | 26509    | MYOF     | -1.20 | 6.79    | -9.41  | 9.99E-17 | 5.88E-16  | 27.09  |
| 10170_at  | 10170    | DHRS9    | -1.20 | 5.56    | -10.99 | 7.40E-21 | 6.34E-20  | 36.54  |
| 54209_at  | 54209    | TREM2    | -1.21 | 5.13    | -11.40 | 6.20E-22 | 6.03E-21  | 39.01  |
| 1378_at   | 1378     | CR1      | -1.23 | 5.94    | -9.97  | 3.54E-18 | 2.40E-17  | 30.41  |
| 6252_at   | 6252     | RTN1     | -1.23 | 5.83    | -12.21 | 4.62E-24 | 5.42E-23  | 43.89  |
| 26253_at  | 26253    | CLEC4E   | -1.23 | 6.17    | -10.09 | 1.74E-18 | 1.21E-17  | 31.11  |
| 3109_at   | 3109     | HLA-DMB  | -1.23 | 6.84    | -12.49 | 8.51E-25 | 1.09E-23  | 45.57  |
| 4286_at   | 4286     | MITF     | -1.23 | 6.07    | -11.29 | 1.23E-21 | 1.17E-20  | 38.32  |
| 2934_at   | 2934     | GSN      | -1.28 | 8.83    | -9.56  | 4.05E-17 | 2.48E-16  | 27.99  |
| 54_at     | 54       | ACP5     | -1.29 | 8.58    | -12.99 | 4.10E-26 | 6.11E-25  | 48.59  |
| 5166_at   | 5166     | PKD4     | -1.32 | 4.20    | -13.50 | 1.86E-27 | 3.29E-26  | 51.67  |
| 54504_at  | 54504    | CPVL     | -1.39 | 3.93    | -9.78  | 1.12E-17 | 7.22E-17  | 29.27  |
| 10261_at  | 10261    | IGSF6    | -1.40 | 7.72    | -9.75  | 1.34E-17 | 8.63E-17  | 29.09  |
| 84417_at  | 84417    | C2orf40  | -1.40 | 6.13    | -16.05 | 4.72E-34 | 1.99E-32  | 66.81  |
| 1050_at   | 1050     | CEBPA    | -1.40 | 6.74    | -12.37 | 1.71E-24 | 2.10E-23  | 44.88  |
| 3627_at   | 3627     | CXCL10   | -1.41 | 5.05    | -5.06  | 1.26E-06 | 3.23E-06  | 4.19   |
| 51311_at  | 51311    | TLR8     | -1.48 | 5.23    | -10.49 | 1.56E-19 | 1.20E-18  | 33.51  |
| 928_at    | 928      | CD9      | -1.52 | 8.26    | -13.48 | 2.08E-27 | 3.60E-26  | 51.56  |
| 7305_at   | 7305     | TYROBP   | -1.56 | 10.08   | -11.26 | 1.43E-21 | 1.34E-20  | 38.18  |
| 6383_at   | 6383     | SDC2     | -1.59 | 8.05    | -10.17 | 1.08E-18 | 7.67E-18  | 31.59  |
| 2219_at   | 2219     | FCN1     | -1.76 | 5.88    | -10.47 | 1.76E-19 | 1.35E-18  | 33.39  |

| ProbeID  | EntrezID | Symbol | logFC | AveExpr | t      | P.Value  | adj.P.Val | B     |
|----------|----------|--------|-------|---------|--------|----------|-----------|-------|
| 7941_at  | 7941     | PLA2G7 | -1.79 | 8.92    | -11.54 | 2.62E-22 | 2.64E-21  | 39.86 |
| 10288_at | 10288    | LILRB2 | -1.79 | 6.24    | -10.14 | 1.24E-18 | 8.71E-18  | 31.45 |
| 1536_at  | 1536     | CYBB   | -1.79 | 7.54    | -12.85 | 9.04E-26 | 1.28E-24  | 47.80 |
| 760_at   | 760      | CA2    | -1.83 | 6.49    | -13.57 | 1.19E-27 | 2.16E-26  | 52.11 |
| 2359_at  | 2359     | FPR3   | -1.87 | 6.59    | -12.99 | 3.93E-26 | 5.89E-25  | 48.63 |
| 6039_at  | 6039     | RNASE6 | -1.88 | 6.97    | -14.51 | 4.25E-30 | 9.90E-29  | 57.73 |
| 2214_at  | 2214     | FCGR3A | -1.92 | 5.99    | -8.39  | 3.85E-14 | 1.85E-13  | 21.19 |
| 4199_at  | 4199     | ME1    | -1.99 | 5.39    | -16.08 | 4.08E-34 | 1.75E-32  | 66.95 |
| 4332_at  | 4332     | MNDA   | -2.09 | 5.49    | -11.92 | 2.69E-23 | 2.95E-22  | 42.13 |
| 6369_at  | 6369     | CCL24  | -2.12 | 9.65    | -11.94 | 2.37E-23 | 2.64E-22  | 42.25 |
| 4069_at  | 4069     | LYZ    | -2.22 | 10.88   | -14.93 | 3.43E-31 | 9.33E-30  | 60.24 |
| 948_at   | 948      | CD36   | -2.29 | 5.46    | -15.39 | 2.29E-32 | 7.71E-31  | 62.94 |
| 10457_at | 10457    | GPNMB  | -2.29 | 6.47    | -14.20 | 2.74E-29 | 5.45E-28  | 55.88 |
| 3957_at  | 3957     | LGALS2 | -2.36 | 5.49    | -8.83  | 2.92E-15 | 1.51E-14  | 23.74 |
| 10875_at | 10875    | FGL2   | -2.55 | 8.18    | -16.73 | 9.16E-36 | 4.60E-34  | 70.74 |
| 79887_at | 79887    | PLBD1  | -2.71 | 6.48    | -19.47 | 2.01E-42 | 2.19E-40  | 86.02 |
| 7045_at  | 7045     | TGFBI  | -2.77 | 7.64    | -16.85 | 4.62E-36 | 2.39E-34  | 71.42 |
| 6035_at  | 6035     | RNASE1 | -3.15 | 6.30    | -15.72 | 3.27E-33 | 1.26E-31  | 64.88 |
| 2167_at  | 2167     | FABP4  | -3.70 | 6.90    | -18.39 | 7.91E-40 | 6.80E-38  | 80.07 |

Differentially expressed genes were identified with *limma* contrasting HDM versus CTRL in CD4+ T cells during SCIT (V2, 3.5mths). ProbeID = , EntrezID = , logFC = log base 2 fold change, AveExpr = average log2-expression level for that gene across all the arrays, t = moderated t-statistic, P.value = the associated p-value, adj.P.Val = the Benjamini & Hochberg adjusted P.value for multiple testing, B = the B-statistic is the log-odds that the gene is differentially expressed.

# **Supplementary Table E5. Top 100 differentially expressed genes (up/down) in CD4+ T cells during SCIT (V4, 12mths).**

| <b>ProbeID</b> | <b>EntrezID</b> | <b>Symbol</b> | <b>logFC</b> | <b>AveExpr</b> | <b>t</b> | <b>P.Value</b> | <b>adj.P.Val</b> | <b>B</b> |
|----------------|-----------------|---------------|--------------|----------------|----------|----------------|------------------|----------|
| 5055_at        | 5055            | SERPINB2      | 3.01         | 7.42           | 11.19    | 2.30E-21       | 1.07E-19         | 37.91    |
| 6347_at        | 6347            | CCL2          | 3.01         | 7.76           | 9.52     | 5.06E-17       | 1.04E-15         | 28.01    |
| 6354_at        | 6354            | CCL7          | 2.93         | 6.62           | 10.32    | 4.26E-19       | 1.24E-17         | 32.74    |
| 3553_at        | 3553            | IL1B          | 2.77         | 8.34           | 9.69     | 1.83E-17       | 3.98E-16         | 29.01    |
| 1154_at        | 1154            | CISH          | 2.23         | 7.68           | 16.00    | 6.28E-34       | 3.42E-31         | 66.59    |
| 3558_at        | 3558            | IL2           | 2.18         | 4.57           | 13.05    | 2.80E-26       | 2.19E-24         | 49.12    |
| 6374_at        | 6374            | CXCL5         | 2.10         | 10.79          | 8.85     | 2.69E-15       | 4.13E-14         | 24.08    |
| 2921_at        | 2921            | CXCL3         | 2.01         | 6.43           | 9.21     | 3.16E-16       | 5.52E-15         | 26.20    |
| 3552_at        | 3552            | IL1A          | 1.98         | 5.66           | 7.93     | 5.27E-13       | 5.58E-12         | 18.87    |
| 2919_at        | 2919            | CXCL1         | 1.94         | 7.97           | 8.62     | 9.94E-15       | 1.37E-13         | 22.79    |
| 8835_at        | 8835            | SOCS2         | 1.94         | 5.65           | 13.34    | 4.66E-27       | 5.25E-25         | 50.90    |
| 3559_at        | 3559            | IL2RA         | 1.77         | 6.83           | 15.82    | 1.84E-33       | 7.50E-31         | 65.52    |
| 4316_at        | 4316            | MMP7          | 1.72         | 5.60           | 9.26     | 2.40E-16       | 4.34E-15         | 26.47    |
| 51339_at       | 51339           | DACT1         | 1.48         | 6.09           | 8.02     | 3.20E-13       | 3.55E-12         | 19.37    |
| 54602_at       | 54602           | NDFIP2        | 1.47         | 4.93           | 8.71     | 5.97E-15       | 8.52E-14         | 23.29    |
| 6364_at        | 6364            | CCL20         | 1.46         | 6.61           | 9.43     | 8.71E-17       | 1.69E-15         | 27.47    |
| 2791_at        | 2791            | GNG11         | 1.44         | 5.78           | 7.80     | 1.11E-12       | 1.13E-11         | 18.14    |
| 6372_at        | 6372            | CXCL6         | 1.41         | 3.96           | 6.10     | 9.10E-09       | 5.19E-08         | 9.29     |
| 79413_at       | 79413           | ZBED2         | 1.37         | 4.70           | 11.07    | 4.59E-21       | 2.03E-19         | 37.22    |
| 3576_at        | 3576            | CXCL8         | 1.36         | 9.94           | 6.90     | 1.45E-10       | 1.05E-09         | 13.35    |
| 8651_at        | 8651            | SOCS1         | 1.31         | 6.17           | 14.42    | 7.44E-30       | 1.16E-27         | 57.29    |
| 6348_at        | 6348            | CCL3          | 1.23         | 7.63           | 5.70     | 6.47E-08       | 3.18E-07         | 7.38     |
| 114801_at      | 114801          | TMEM200A      | 1.21         | 4.99           | 11.79    | 5.70E-23       | 3.58E-21         | 41.57    |
| 3562_at        | 3562            | IL3           | 1.18         | 3.28           | 5.69     | 6.59E-08       | 3.22E-07         | 7.37     |
| 718_at         | 718             | C3            | 1.16         | 5.54           | 7.77     | 1.25E-12       | 1.26E-11         | 18.02    |
| 4495_at        | 4495            | MT1G          | 1.16         | 7.62           | 5.69     | 6.66E-08       | 3.25E-07         | 7.35     |
| 3578_at        | 3578            | IL9           | 1.15         | 4.31           | 3.88     | 1.61E-04       | 4.67E-04         | -0.14    |
| 4603_at        | 4603            | MYBL1         | 1.14         | 8.36           | 10.61    | 7.59E-20       | 2.55E-18         | 34.44    |
| 3002_at        | 3002            | GZMB          | 1.13         | 6.84           | 5.79     | 4.12E-08       | 2.11E-07         | 7.82     |
| 5732_at        | 5732            | PTGER2        | 1.12         | 8.32           | 9.83     | 8.12E-18       | 1.85E-16         | 29.82    |
| 2920_at        | 2920            | CXCL2         | 1.12         | 8.02           | 5.91     | 2.26E-08       | 1.20E-07         | 8.41     |
| 7980_at        | 7980            | TFPI2         | 1.11         | 4.41           | 6.95     | 1.13E-10       | 8.40E-10         | 13.59    |
| 6367_at        | 6367            | CCL22         | 1.10         | 9.06           | 9.20     | 3.49E-16       | 6.05E-15         | 26.10    |
| 705_at         | 705             | BYSL          | 1.08         | 6.53           | 15.67    | 4.46E-33       | 1.62E-30         | 64.64    |
| 84830_at       | 84830           | ADTRP         | 1.07         | 6.19           | 13.33    | 5.24E-27       | 5.53E-25         | 50.79    |
| 5292_at        | 5292            | PIM1          | 1.05         | 8.90           | 18.35    | 9.86E-40       | 1.61E-36         | 79.82    |
| 4496_at        | 4496            | MT1H          | 1.03         | 7.64           | 5.76     | 4.74E-08       | 2.41E-07         | 7.69     |
| 91523_at       | 91523           | PCED1B        | 1.02         | 8.77           | 16.97    | 2.29E-36       | 2.49E-33         | 72.15    |
| 55022_at       | 55022           | PID1          | 1.02         | 6.03           | 5.58     | 1.14E-07       | 5.35E-07         | 6.83     |

| ProbeID   | EntrezID | Symbol   | logFC | AveExpr | t      | P.Value  | adj.P.Val | B     |
|-----------|----------|----------|-------|---------|--------|----------|-----------|-------|
| 170691_at | 170691   | ADAMTS17 | 1.02  | 5.21    | 12.50  | 7.96E-25 | 5.65E-23  | 45.81 |
| 4312_at   | 4312     | MMP1     | 1.01  | 3.93    | 4.62   | 8.32E-06 | 2.92E-05  | 2.68  |
| 3624_at   | 3624     | INHBA    | 1.00  | 6.01    | 9.28   | 2.16E-16 | 3.99E-15  | 26.57 |
| 6447_at   | 6447     | SCG5     | 1.00  | 5.08    | 6.61   | 6.88E-10 | 4.64E-09  | 11.82 |
| 25902_at  | 25902    | MTHFD1L  | 0.99  | 7.03    | 18.41  | 6.91E-40 | 1.61E-36  | 80.17 |
| 6875_at   | 6875     | TAF4B    | 0.97  | 6.83    | 14.94  | 3.25E-31 | 6.24E-29  | 60.39 |
| 1839_at   | 1839     | HBEGF    | 0.95  | 4.19    | 9.85   | 7.45E-18 | 1.71E-16  | 29.90 |
| 3566_at   | 3566     | IL4R     | 0.93  | 7.40    | 7.92   | 5.38E-13 | 5.68E-12  | 18.85 |
| 1847_at   | 1847     | DUSP5    | 0.92  | 7.01    | 8.01   | 3.33E-13 | 3.66E-12  | 19.32 |
| 1462_at   | 1462     | VCAN     | 0.92  | 4.05    | 6.44   | 1.62E-09 | 1.04E-08  | 10.98 |
| 7293_at   | 7293     | TNFRSF4  | 0.89  | 7.04    | 7.74   | 1.48E-12 | 1.47E-11  | 17.86 |
| 1823_at   | 1823     | DSC1     | -0.83 | 5.50    | -7.65  | 2.46E-12 | 2.36E-11  | 17.35 |
| 3434_at   | 3434     | IFIT1    | -0.83 | 8.38    | -3.82  | 2.00E-04 | 5.71E-04  | -0.35 |
| 7077_at   | 7077     | TIMP2    | -0.84 | 7.27    | -8.61  | 1.07E-14 | 1.48E-13  | 22.71 |
| 6614_at   | 6614     | SIGLEC1  | -0.85 | 5.61    | -6.05  | 1.16E-08 | 6.43E-08  | 9.06  |
| 8714_at   | 8714     | ABCC3    | -0.86 | 5.55    | -7.41  | 9.18E-12 | 8.15E-11  | 16.06 |
| 760_at    | 760      | CA2      | -0.86 | 6.49    | -6.16  | 6.72E-09 | 3.90E-08  | 9.59  |
| 84417_at  | 84417    | C2orf40  | -0.86 | 6.13    | -9.59  | 3.47E-17 | 7.25E-16  | 28.38 |
| 3597_at   | 3597     | IL13RA1  | -0.89 | 5.44    | -7.07  | 5.97E-11 | 4.67E-10  | 14.22 |
| 22797_at  | 22797    | TFEC     | -0.90 | 5.45    | -7.16  | 3.70E-11 | 2.98E-10  | 14.69 |
| 5836_at   | 5836     | PYGL     | -0.95 | 5.39    | -6.95  | 1.14E-10 | 8.41E-10  | 13.59 |
| 3109_at   | 3109     | HLA-DMB  | -0.95 | 6.84    | -9.30  | 1.87E-16 | 3.49E-15  | 26.71 |
| 50856_at  | 50856    | CLEC4A   | -0.97 | 7.81    | -7.97  | 4.28E-13 | 4.59E-12  | 19.08 |
| 7850_at   | 7850     | IL1R2    | -0.97 | 6.73    | -4.91  | 2.41E-06 | 9.10E-06  | 3.88  |
| 120892_at | 120892   | LRRK2    | -0.99 | 5.13    | -8.76  | 4.43E-15 | 6.43E-14  | 23.59 |
| 4286_at   | 4286     | MITF     | -0.99 | 6.07    | -8.81  | 3.41E-15 | 5.07E-14  | 23.85 |
| 928_at    | 928      | CD9      | -0.99 | 8.26    | -8.55  | 1.53E-14 | 2.05E-13  | 22.37 |
| 10410_at  | 10410    | IFITM3   | -1.04 | 6.59    | -5.82  | 3.62E-08 | 1.87E-07  | 7.95  |
| 7305_at   | 7305     | TYROBP   | -1.04 | 10.08   | -7.32  | 1.57E-11 | 1.32E-10  | 15.53 |
| 6252_at   | 6252     | RTN1     | -1.06 | 5.83    | -10.26 | 6.06E-19 | 1.73E-17  | 32.39 |
| 1536_at   | 1536     | CYBB     | -1.08 | 7.54    | -7.53  | 4.77E-12 | 4.40E-11  | 16.70 |
| 2359_at   | 2359     | FPR3     | -1.09 | 6.59    | -7.33  | 1.44E-11 | 1.22E-10  | 15.62 |
| 54504_at  | 54504    | CPVL     | -1.10 | 3.93    | -7.50  | 5.82E-12 | 5.30E-11  | 16.51 |
| 1050_at   | 1050     | CEBPA    | -1.10 | 6.74    | -9.40  | 1.05E-16 | 2.01E-15  | 27.29 |
| 10288_at  | 10288    | LILRB2   | -1.10 | 6.24    | -6.05  | 1.14E-08 | 6.30E-08  | 9.08  |
| 55016_at  | 55016    | MARCH1   | -1.10 | 4.41    | -10.06 | 2.04E-18 | 5.28E-17  | 31.19 |
| 6369_at   | 6369     | CCL24    | -1.12 | 9.65    | -6.09  | 9.29E-09 | 5.28E-08  | 9.27  |
| 2214_at   | 2214     | FCGR3A   | -1.12 | 5.99    | -4.75  | 4.78E-06 | 1.73E-05  | 3.22  |
| 216_at    | 216      | ALDH1A1  | -1.13 | 3.62    | -9.91  | 4.95E-18 | 1.19E-16  | 30.31 |
| 10170_at  | 10170    | DHRS9    | -1.13 | 5.56    | -10.06 | 2.09E-18 | 5.34E-17  | 31.16 |
| 5166_at   | 5166     | PDK4     | -1.14 | 4.20    | -11.29 | 1.18E-21 | 5.89E-20  | 38.57 |
| 7941_at   | 7941     | PLA2G7   | -1.15 | 8.92    | -7.20  | 2.93E-11 | 2.40E-10  | 14.92 |

| ProbeID   | EntrezID | Symbol   | logFC | AveExpr | t      | P.Value  | adj.P.Val | B     |
|-----------|----------|----------|-------|---------|--------|----------|-----------|-------|
| 6039_at   | 6039     | RNASE6   | -1.16 | 6.97    | -8.67  | 7.45E-15 | 1.05E-13  | 23.07 |
| 26253_at  | 26253    | CLEC4E   | -1.16 | 6.17    | -9.25  | 2.54E-16 | 4.53E-15  | 26.41 |
| 54_at     | 54       | ACP5     | -1.16 | 8.58    | -11.38 | 6.85E-22 | 3.55E-20  | 39.11 |
| 54209_at  | 54209    | TREM2    | -1.18 | 5.13    | -10.76 | 3.10E-20 | 1.11E-18  | 35.33 |
| 51311_at  | 51311    | TLR8     | -1.25 | 5.23    | -8.59  | 1.21E-14 | 1.65E-13  | 22.60 |
| 3627_at   | 3627     | CXCL10   | -1.27 | 5.05    | -4.44  | 1.76E-05 | 5.85E-05  | 1.96  |
| 200315_at | 200315   | APOBEC3A | -1.29 | 4.78    | -5.88  | 2.65E-08 | 1.39E-07  | 8.25  |
| 4069_at   | 4069     | LYZ      | -1.45 | 10.88   | -9.46  | 7.25E-17 | 1.43E-15  | 27.65 |
| 4332_at   | 4332     | MNDA     | -1.46 | 5.49    | -8.06  | 2.49E-13 | 2.84E-12  | 19.61 |
| 2219_at   | 2219     | FCN1     | -1.48 | 5.88    | -8.56  | 1.44E-14 | 1.95E-13  | 22.42 |
| 10457_at  | 10457    | GPNMB    | -1.48 | 6.47    | -8.91  | 1.83E-15 | 2.89E-14  | 24.46 |
| 2167_at   | 2167     | FABP4    | -1.52 | 6.90    | -7.32  | 1.51E-11 | 1.27E-10  | 15.57 |
| 948_at    | 948      | CD36     | -1.69 | 5.46    | -11.01 | 6.85E-21 | 2.94E-19  | 36.83 |
| 3957_at   | 3957     | LGALS2   | -1.73 | 5.49    | -6.27  | 3.79E-09 | 2.29E-08  | 10.15 |
| 4199_at   | 4199     | ME1      | -1.76 | 5.39    | -13.80 | 2.99E-28 | 3.75E-26  | 53.63 |
| 7045_at   | 7045     | TGFBI    | -1.82 | 7.64    | -10.71 | 4.13E-20 | 1.45E-18  | 35.05 |
| 10875_at  | 10875    | FGL2     | -1.82 | 8.18    | -11.56 | 2.39E-22 | 1.30E-20  | 40.15 |
| 6035_at   | 6035     | RNASE1   | -1.94 | 6.30    | -9.39  | 1.09E-16 | 2.07E-15  | 27.25 |
| 79887_at  | 79887    | PLBD1    | -2.23 | 6.48    | -15.53 | 9.82E-33 | 2.91E-30  | 63.86 |

Differentially expressed genes were identified with *limma* contrasting HDM versus CTRL in CD4<sup>+</sup> T cells during SCIT (V4, 12 mths). ProbeID = , EntrezID = , logFC = log base 2 fold change, AveExpr = average log2-expression level for that gene across all the arrays, t = moderated t-statistic, P.value = the associated p-value, adj.P.Val = the Benjamini & Hochberg adjusted P.value for multiple testing, B = the B-statistic is the log-odds that the gene is differentially expressed.

**Supplementary Table E6. Top 100 differentially expressed genes (up/down) in CD4+ T cells during SCIT (V5, 24mths).**

| ProbeID   | EntrezID | Symbol   | logFC | AveExpr | t     | P.Value  | adj.P.Val | B     |
|-----------|----------|----------|-------|---------|-------|----------|-----------|-------|
| 6374_at   | 6374     | CXCL5    | 3.39  | 8.33    | 11.51 | 7.02E-12 | 7.50E-11  | 16.98 |
| 6347_at   | 6347     | CCL2     | 3.25  | 5.41    | 12.77 | 6.50E-13 | 1.05E-11  | 19.40 |
| 5055_at   | 5055     | SERPINB2 | 3.04  | 5.91    | 10.50 | 5.34E-11 | 4.51E-10  | 14.92 |
| 1154_at   | 1154     | CISH     | 2.69  | 7.34    | 20.71 | 4.95E-18 | 8.61E-16  | 31.28 |
| 3553_at   | 3553     | IL1B     | 2.62  | 7.23    | 9.65  | 3.22E-10 | 2.18E-09  | 13.09 |
| 3558_at   | 3558     | IL2      | 2.42  | 4.19    | 15.85 | 3.80E-15 | 1.69E-13  | 24.61 |
| 3578_at   | 3578     | IL9      | 2.41  | 3.89    | 5.98  | 2.26E-06 | 6.56E-06  | 4.11  |
| 8835_at   | 8835     | SOCS2    | 2.39  | 4.70    | 17.80 | 2.21E-16 | 1.58E-14  | 27.47 |
| 6354_at   | 6354     | CCL7     | 2.35  | 4.62    | 9.77  | 2.48E-10 | 1.74E-09  | 13.36 |
| 4316_at   | 4316     | MMP7     | 2.13  | 4.29    | 10.95 | 2.12E-11 | 1.99E-10  | 15.86 |
| 79413_at  | 79413    | ZBED2    | 2.10  | 4.09    | 16.07 | 2.74E-15 | 1.33E-13  | 24.94 |
| 3559_at   | 3559     | IL2RA    | 2.09  | 5.85    | 25.81 | 1.78E-20 | 2.27E-17  | 36.84 |
| 3552_at   | 3552     | IL1A     | 2.04  | 4.74    | 8.44  | 4.99E-09 | 2.50E-08  | 10.30 |
| 2919_at   | 2919     | CXCL1    | 1.91  | 6.74    | 9.06  | 1.20E-09 | 6.94E-09  | 11.76 |
| 54602_at  | 54602    | NDFIP2   | 1.90  | 4.40    | 12.36 | 1.39E-12 | 1.96E-11  | 18.63 |
| 6364_at   | 6364     | CCL20    | 1.79  | 5.76    | 15.73 | 4.59E-15 | 2.00E-13  | 24.42 |
| 3002_at   | 3002     | GZMB     | 1.74  | 6.23    | 7.92  | 1.72E-08 | 7.63E-08  | 9.04  |
| 3562_at   | 3562     | IL3      | 1.73  | 2.78    | 6.71  | 3.47E-07 | 1.17E-06  | 6.00  |
| 114801_at | 114801   | TMEM200A | 1.70  | 4.91    | 17.46 | 3.55E-16 | 2.23E-14  | 27.00 |
| 8651_at   | 8651     | SOCS1    | 1.69  | 5.77    | 20.43 | 6.98E-18 | 1.11E-15  | 30.93 |
| 2921_at   | 2921     | CXCL3    | 1.68  | 4.74    | 9.56  | 3.91E-10 | 2.60E-09  | 12.89 |
| 51339_at  | 51339    | DACT1    | 1.66  | 5.45    | 10.41 | 6.37E-11 | 5.25E-10  | 14.74 |
| 3576_at   | 3576     | CXCL8    | 1.61  | 8.14    | 9.04  | 1.25E-09 | 7.22E-09  | 11.71 |
| 7293_at   | 7293     | TNFRSF4  | 1.58  | 6.75    | 12.73 | 6.98E-13 | 1.12E-11  | 19.33 |
| 1847_at   | 1847     | DUSP5    | 1.54  | 6.21    | 13.24 | 2.83E-13 | 5.39E-12  | 20.24 |
| 5732_at   | 5732     | PTGER2   | 1.52  | 7.76    | 18.87 | 5.17E-17 | 5.21E-15  | 28.93 |
| 5996_at   | 5996     | RGS1     | 1.45  | 7.74    | 16.77 | 9.61E-16 | 5.10E-14  | 25.99 |
| 3620_at   | 3620     | IDO1     | 1.42  | 5.76    | 14.21 | 5.26E-14 | 1.36E-12  | 21.95 |
| 6367_at   | 6367     | CCL22    | 1.41  | 7.99    | 16.84 | 8.73E-16 | 4.84E-14  | 26.09 |
| 5292_at   | 5292     | PIM1     | 1.40  | 8.04    | 28.56 | 1.29E-21 | 4.67E-18  | 39.40 |
| 50810_at  | 50810    | HDGFL3   | 1.36  | 5.64    | 17.79 | 2.23E-16 | 1.58E-14  | 27.46 |
| 115362_at | 115362   | GBP5     | 1.33  | 8.56    | 14.51 | 3.24E-14 | 8.98E-13  | 22.44 |
| 112744_at | 112744   | IL17F    | 1.32  | 4.21    | 5.51  | 7.86E-06 | 2.06E-05  | 2.86  |
| 3604_at   | 3604     | TNFRSF9  | 1.30  | 4.71    | 13.28 | 2.64E-13 | 5.12E-12  | 20.31 |
| 8553_at   | 8553     | BHLHE40  | 1.30  | 6.73    | 14.49 | 3.36E-14 | 9.23E-13  | 22.40 |
| 6348_at   | 6348     | CCL3     | 1.29  | 6.06    | 5.57  | 6.71E-06 | 1.77E-05  | 3.02  |
| 27074_at  | 27074    | LAMP3    | 1.29  | 5.00    | 19.11 | 3.78E-17 | 4.25E-15  | 29.25 |
| 3458_at   | 3458     | IFNG     | 1.29  | 4.45    | 8.53  | 4.02E-09 | 2.06E-08  | 10.52 |
| 25902_at  | 25902    | MTHFD1L  | 1.26  | 6.36    | 24.97 | 4.20E-20 | 4.01E-17  | 36.00 |

| ProbeID   | EntrezID | Symbol   | logFC | AveExpr | t      | P.Value  | adj.P.Val | B     |
|-----------|----------|----------|-------|---------|--------|----------|-----------|-------|
| 7291_at   | 7291     | TWIST1   | 1.25  | 3.19    | 11.35  | 9.56E-12 | 9.83E-11  | 16.67 |
| 6875_at   | 6875     | TAF4B    | 1.24  | 6.28    | 22.11  | 9.39E-19 | 2.63E-16  | 32.93 |
| 705_at    | 705      | BYSL     | 1.24  | 6.13    | 20.76  | 4.69E-18 | 8.58E-16  | 31.33 |
| 6004_at   | 6004     | RGS16    | 1.24  | 4.03    | 18.96  | 4.57E-17 | 4.99E-15  | 29.06 |
| 4603_at   | 4603     | MYBL1    | 1.23  | 7.95    | 18.74  | 6.18E-17 | 5.91E-15  | 28.75 |
| 170691_at | 170691   | ADAMTS17 | 1.20  | 4.91    | 15.27  | 9.37E-15 | 3.35E-13  | 23.69 |
| 3566_at   | 3566     | IL4R     | 1.20  | 6.80    | 11.02  | 1.86E-11 | 1.78E-10  | 15.99 |
| 3596_at   | 3596     | IL13     | 1.17  | 3.87    | 6.09   | 1.72E-06 | 5.08E-06  | 4.39  |
| 4312_at   | 4312     | MMP1     | 1.15  | 3.13    | 4.81   | 5.15E-05 | 1.20E-04  | 0.98  |
| 84830_at  | 84830    | ADTRP    | 1.12  | 6.02    | 19.74  | 1.67E-17 | 2.36E-15  | 30.06 |
| 84937_at  | 84937    | ZNRF1    | 1.11  | 6.62    | 19.13  | 3.68E-17 | 4.25E-15  | 29.27 |
| 8714_at   | 8714     | ABCC3    | -0.98 | 4.69    | -7.76  | 2.53E-08 | 1.08E-07  | 8.66  |
| 3108_at   | 3108     | HLA-DMA  | -0.99 | 6.18    | -9.21  | 8.59E-10 | 5.25E-09  | 12.09 |
| 3597_at   | 3597     | IL13RA1  | -0.99 | 3.85    | -7.60  | 3.68E-08 | 1.53E-07  | 8.28  |
| 29992_at  | 29992    | PILRA    | -0.99 | 6.18    | -8.87  | 1.85E-09 | 1.03E-08  | 11.31 |
| 55016_at  | 55016    | MARCH1   | -1.01 | 3.11    | -8.12  | 1.05E-08 | 4.86E-08  | 9.55  |
| 2517_at   | 2517     | FUCA1    | -1.02 | 6.50    | -8.40  | 5.40E-09 | 2.67E-08  | 10.22 |
| 140807_at | 140807   | KRT72    | -1.04 | 6.09    | -17.52 | 3.26E-16 | 2.15E-14  | 27.08 |
| 120892_at | 120892   | LRRK2    | -1.04 | 3.55    | -7.63  | 3.48E-08 | 1.46E-07  | 8.33  |
| 22797_at  | 22797    | TFEC     | -1.04 | 3.70    | -7.96  | 1.54E-08 | 6.88E-08  | 9.16  |
| 4286_at   | 4286     | MITF     | -1.05 | 4.86    | -8.58  | 3.62E-09 | 1.88E-08  | 10.63 |
| 5836_at   | 5836     | PYGL     | -1.10 | 3.80    | -7.85  | 2.01E-08 | 8.81E-08  | 8.89  |
| 50856_at  | 50856    | CLEC4A   | -1.12 | 6.34    | -9.91  | 1.86E-10 | 1.34E-09  | 13.65 |
| 928_at    | 928      | CD9      | -1.12 | 6.75    | -8.15  | 9.92E-09 | 4.63E-08  | 9.61  |
| 1471_at   | 1471     | CST3     | -1.12 | 4.78    | -8.67  | 2.89E-09 | 1.54E-08  | 10.86 |
| 1823_at   | 1823     | DSC1     | -1.13 | 4.72    | -14.17 | 5.66E-14 | 1.41E-12  | 21.87 |
| 1378_at   | 1378     | CR1      | -1.13 | 5.42    | -15.70 | 4.81E-15 | 2.07E-13  | 24.37 |
| 10437_at  | 10437    | IFI30    | -1.13 | 9.57    | -8.84  | 1.96E-09 | 1.09E-08  | 11.26 |
| 6252_at   | 6252     | RTN1     | -1.14 | 4.68    | -9.55  | 4.06E-10 | 2.68E-09  | 12.85 |
| 2934_at   | 2934     | GSN      | -1.16 | 7.25    | -8.02  | 1.35E-08 | 6.11E-08  | 9.29  |
| 1050_at   | 1050     | CEBPA    | -1.18 | 5.83    | -8.84  | 1.99E-09 | 1.10E-08  | 11.24 |
| 5166_at   | 5166     | PKD4     | -1.23 | 3.07    | -9.76  | 2.54E-10 | 1.77E-09  | 13.33 |
| 84417_at  | 84417    | C2orf40  | -1.24 | 5.53    | -17.06 | 6.28E-16 | 3.64E-14  | 26.42 |
| 760_at    | 760      | CA2      | -1.26 | 4.80    | -7.81  | 2.22E-08 | 9.65E-08  | 8.79  |
| 26253_at  | 26253    | CLEC4E   | -1.28 | 4.86    | -9.86  | 2.06E-10 | 1.47E-09  | 13.55 |
| 10462_at  | 10462    | CLEC10A  | -1.29 | 4.00    | -6.90  | 2.10E-07 | 7.34E-07  | 6.51  |
| 2359_at   | 2359     | FPR3     | -1.29 | 5.43    | -8.88  | 1.79E-09 | 1.01E-08  | 11.35 |
| 51311_at  | 51311    | TLR8     | -1.30 | 4.01    | -8.33  | 6.51E-09 | 3.15E-08  | 10.03 |
| 6383_at   | 6383     | SDC2     | -1.31 | 6.07    | -9.10  | 1.10E-09 | 6.45E-09  | 11.84 |
| 54504_at  | 54504    | CPVL     | -1.36 | 3.09    | -8.01  | 1.37E-08 | 6.20E-08  | 9.28  |
| 2214_at   | 2214     | FCGR3A   | -1.36 | 4.06    | -7.05  | 1.44E-07 | 5.23E-07  | 6.89  |
| 3109_at   | 3109     | HLA-DMB  | -1.39 | 5.27    | -10.89 | 2.39E-11 | 2.21E-10  | 15.73 |



| ProbeID  | EntrezID | Symbol | logFC | AveExpr | t      | P.Value  | adj.P.Val | B     |
|----------|----------|--------|-------|---------|--------|----------|-----------|-------|
| 4199_at  | 4199     | ME1    | -1.40 | 3.77    | -8.63  | 3.17E-09 | 1.68E-08  | 10.76 |
| 10261_at | 10261    | IGSF6  | -1.40 | 5.84    | -10.06 | 1.33E-10 | 1.01E-09  | 13.99 |
| 6369_at  | 6369     | CCL24  | -1.46 | 7.25    | -8.28  | 7.31E-09 | 3.51E-08  | 9.92  |
| 10288_at | 10288    | LILRB2 | -1.56 | 4.50    | -9.22  | 8.39E-10 | 5.14E-09  | 12.12 |
| 10457_at | 10457    | GPNUMB | -1.63 | 4.52    | -11.55 | 6.46E-12 | 7.06E-11  | 17.06 |
| 7305_at  | 7305     | TYROBP | -1.64 | 8.42    | -13.33 | 2.39E-13 | 4.72E-12  | 20.42 |
| 1536_at  | 1536     | CYBB   | -1.70 | 5.64    | -12.86 | 5.53E-13 | 9.27E-12  | 19.56 |
| 7941_at  | 7941     | PLA2G7 | -1.73 | 7.07    | -12.37 | 1.36E-12 | 1.93E-11  | 18.65 |
| 6039_at  | 6039     | RNASE6 | -1.78 | 5.31    | -11.54 | 6.55E-12 | 7.12E-11  | 17.05 |
| 2219_at  | 2219     | FCN1   | -1.83 | 5.10    | -9.53  | 4.17E-10 | 2.74E-09  | 12.83 |
| 948_at   | 948      | CD36   | -1.85 | 4.28    | -11.06 | 1.71E-11 | 1.64E-10  | 16.08 |
| 4332_at  | 4332     | MNDA   | -1.85 | 3.66    | -8.47  | 4.59E-09 | 2.33E-08  | 10.39 |
| 10875_at | 10875    | FGL2   | -1.95 | 6.62    | -10.51 | 5.16E-11 | 4.38E-10  | 14.95 |
| 7045_at  | 7045     | TGFBI  | -2.08 | 6.21    | -12.14 | 2.10E-12 | 2.71E-11  | 18.21 |
| 3957_at  | 3957     | LGALS2 | -2.25 | 4.40    | -9.94  | 1.73E-10 | 1.26E-09  | 13.72 |
| 2167_at  | 2167     | FABP4  | -2.30 | 4.61    | -9.39  | 5.75E-10 | 3.64E-09  | 12.50 |
| 4069_at  | 4069     | LYZ    | -2.34 | 9.29    | -15.34 | 8.50E-15 | 3.12E-13  | 23.79 |
| 6035_at  | 6035     | RNASE1 | -2.38 | 5.47    | -10.34 | 7.40E-11 | 6.01E-10  | 14.59 |
| 79887_at | 79887    | PLBD1  | -2.40 | 5.07    | -11.47 | 7.55E-12 | 7.95E-11  | 16.91 |

Differentially expressed genes were identified with *limma* contrasting HDM versus CTRL in CD4+ T cells during SCIT (V5, 24mths). ProbeID = , EntrezID = , logFC = log base 2 fold change, AveExpr = average log2-expression level for that gene across all the arrays, t = moderated t-statistic, P.value = the associated p-value, adj.P.Val = the Benjamini & Hochberg adjusted P.value for multiple testing, B = the B-statistic is the log-odds that the gene is differentially expressed.

## Supplementary Table E7. Cytoscape metrics for the network at V5.

| GeneID  | Module assignment V1 | BetweennessCentrality | Degree |
|---------|----------------------|-----------------------|--------|
| PRDX4   | IL2 signalling (I)   | 0.1616                | 20     |
| BATF    | IL2 signalling (I)   | 0.1297                | 43     |
| CISH    | Th2 (F)              | 0.1243                | 42     |
| NDFIP2  | Th2 (F)              | 0.1056                | 20     |
| MTHFD2  | Inflammation (G)     | 0.0899                | 11     |
| PSMD14  | Inflammation (G)     | 0.0873                | 7      |
| MVP     | IL2 signalling (I)   | 0.0768                | 26     |
| SOCS1   | IL2 signalling (I)   | 0.0725                | 48     |
| DTX3L   | Type 1 IFN (A)       | 0.0564                | 14     |
| SOCS2   | IL2 signalling (I)   | 0.0508                | 31     |
| BHLHE40 | Th2 (F)              | 0.0475                | 26     |
| APOL1   | Type 1 IFN (A)       | 0.0462                | 12     |
| PSME1   | Type 1 IFN (A)       | 0.0458                | 17     |
| PARP9   | Type 1 IFN (A)       | 0.0457                | 16     |
| IL2     | IL2 signalling (I)   | 0.0445                | 31     |
| PIM1    | IL2 signalling (I)   | 0.0442                | 37     |
| PSMA3   | Inflammation (G)     | 0.0431                | 5      |
| ARID5A  | IL2 signalling (I)   | 0.0402                | 32     |
| IL2RA   | IL2 signalling (I)   | 0.0402                | 40     |
| ZBED2   | IL2 signalling (I)   | 0.0374                | 33     |

Network wiring diagrams were constructed utilising the top-weighted 800 gene-gene interactions extracted from the adjacency matrix from the expression data. BetweennessCentrality = genes in the network that have many "shortest paths" going through them, i.e. connector genes. The closeness centrality measure of each gene to another in the network is a number between 0 and 1; Degree = number of connections with other genes in the network.

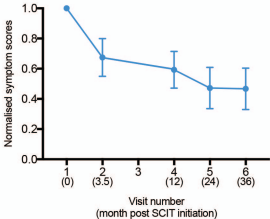

Figure 1

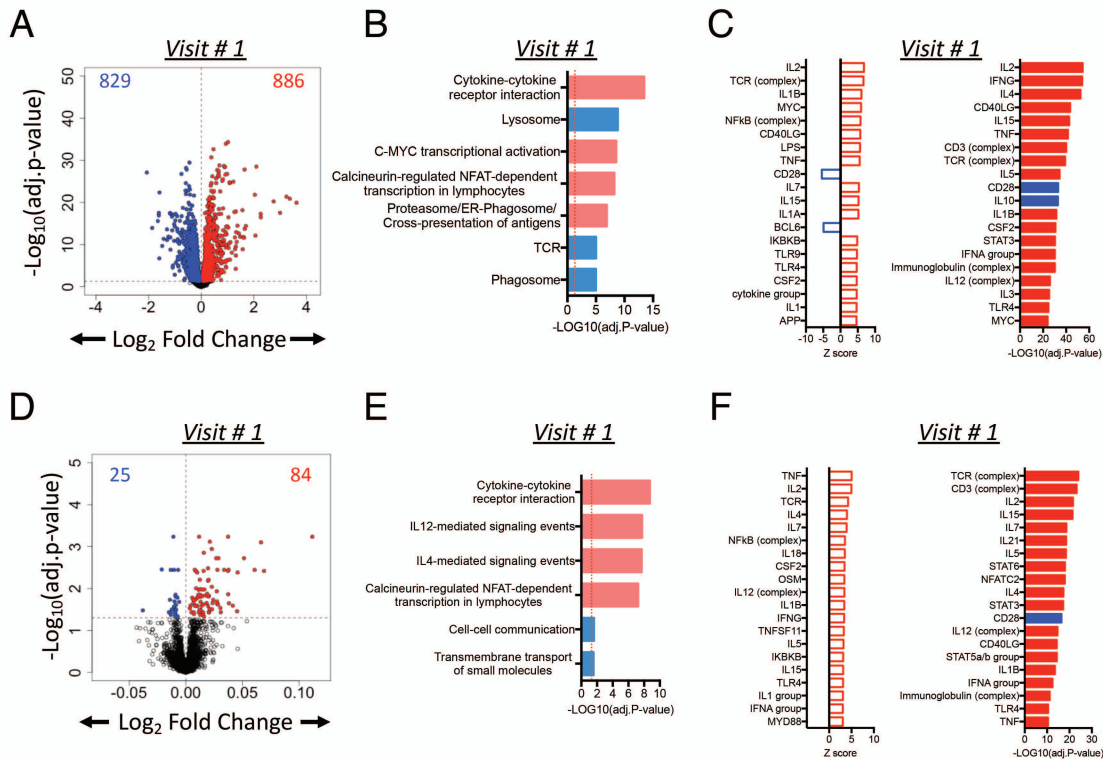

Figure 2

A

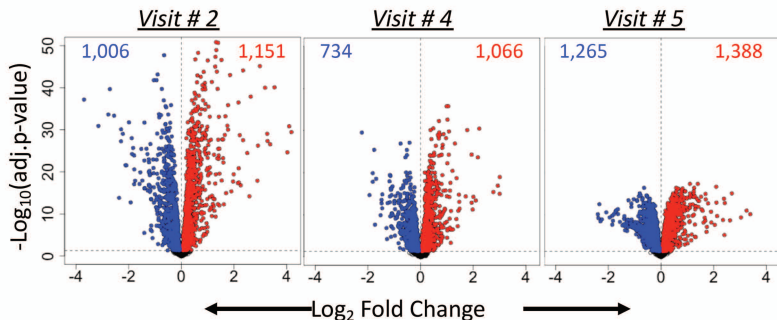

B

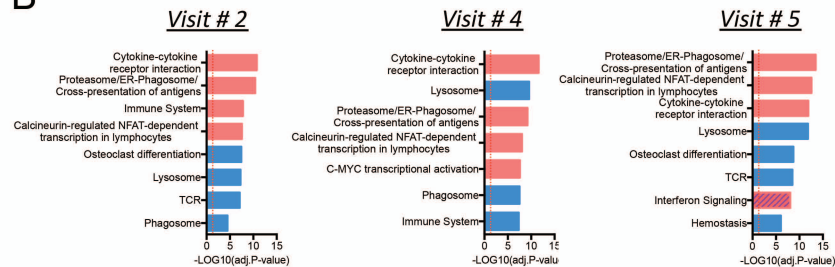

C

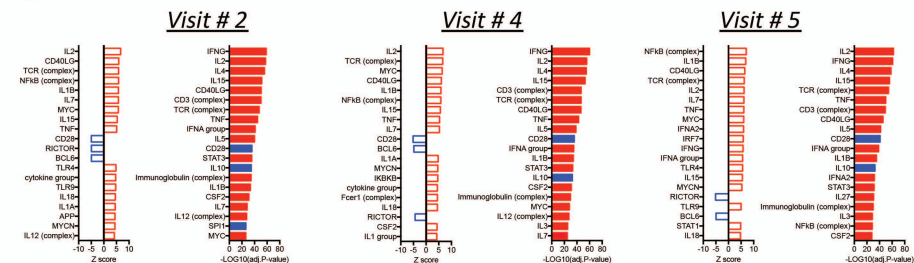

Figure 3

A

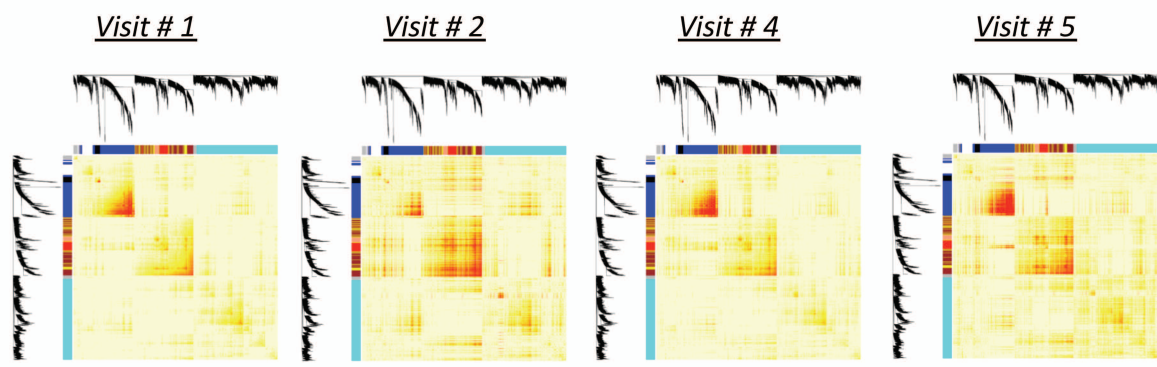

B

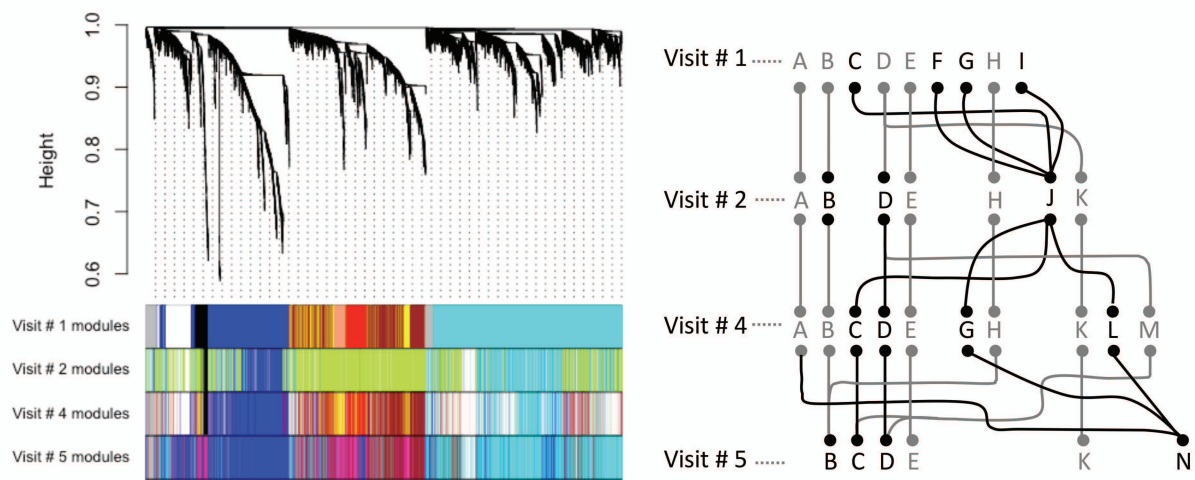

C

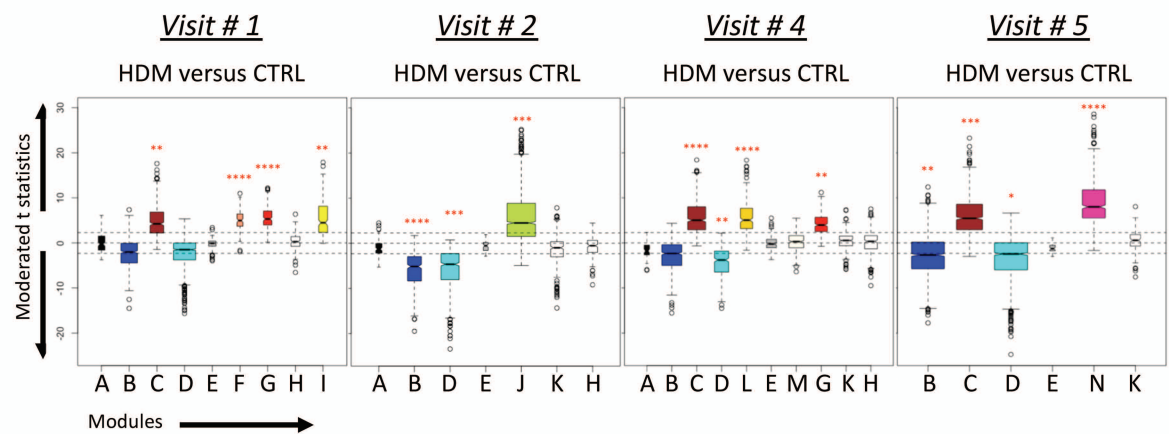

| Module Legend                                                                  |                                                                                                                                                 |
|--------------------------------------------------------------------------------|-------------------------------------------------------------------------------------------------------------------------------------------------|
| A Type 1 interferon – not differentially expressed                             | H FAS signaling – not differentially expressed                                                                                                  |
| B Lysosome/phagosome/antigen processing & presentation                         | I IL2 signaling / Foxp3                                                                                                                         |
| C Ribosome/Translation/Metabolism of proteins                                  | J Th2, inflammation/proteasome/phagosome & cytokine receptor interaction, metabolism of proteins, IL2 signaling/Foxp3,                          |
| D TCR signaling                                                                | K Transcription & IL6 signalling – not differentially expressed                                                                                 |
| E Unassigned/unclustered genes – not differentially expressed                  | L Th2, proteasome/phagosome & cytokine receptor interaction, metabolism of proteins, IL2 signalling/Foxp3                                       |
| F Th2                                                                          | M Ribosomal translation – not differentially expressed                                                                                          |
| G Inflammation/chemokine & cytokine receptor interactions/phagosome/proteasome | N Th2, inflammation/proteasome/phagosome & cytokine receptor interaction, metabolism of proteins, IL2 signaling/Foxp3, <b>type 1 interferon</b> |
| Median adj. p-value: * = 0.05, ** = 0.01, *** = 0.001, **** = 0.0001           |                                                                                                                                                 |

Figure 4

# Visit #1

IL2 signalling module (I)

Th2 module (F)

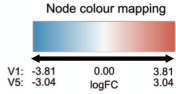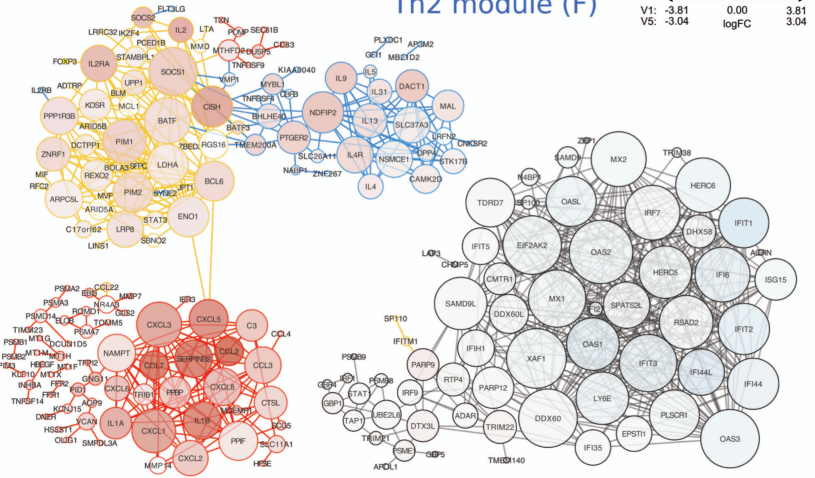

Inflammatory module (G)

Type 1 interferon module (A)

# Visit #5

Th2 module (F)

Type 1 interferon module (A)

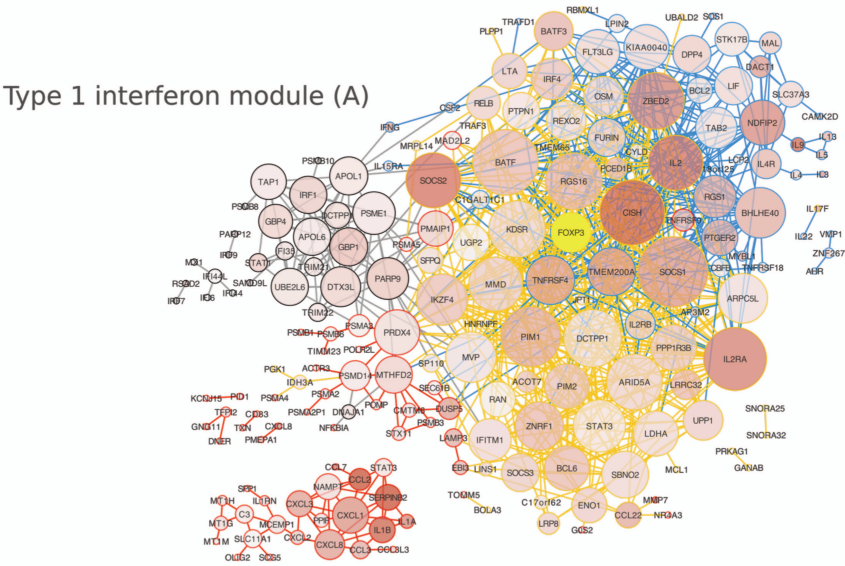

Inflammatory module (G)

IL2 signalling module (I)

Figure 5

## SCIT treatment/sample collection schedule

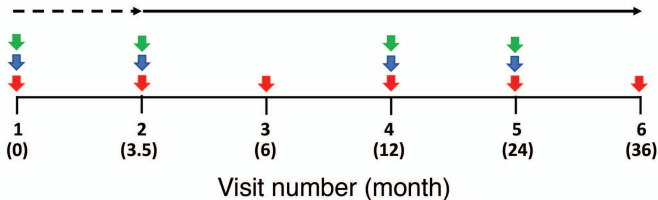

- ↓ Clinical assessment
- ↓ Serum for antibody
- ↓ PBMC for transcriptomics
- → SCIT up-dosing
- SCIT monthly maintenance therapy

Supplementary Figure E1



A

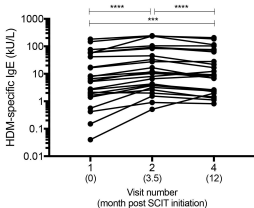

B

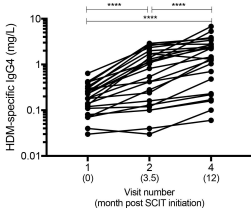

Supplementary Figure E2

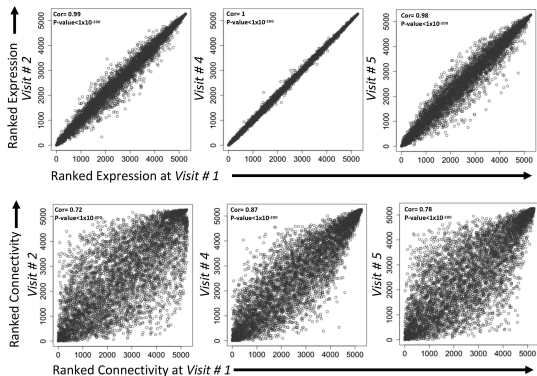

Supplementary Figure E3

## Visit #2

Inflammatory module (G)

IL2 signalling module (I)

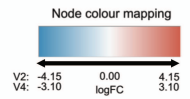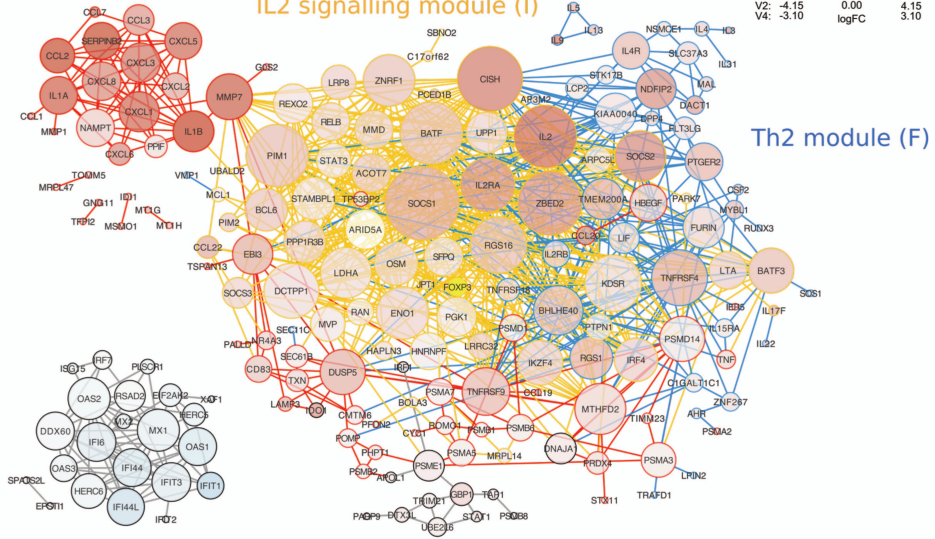

## Visit #4

Type 1 interferon module (A)

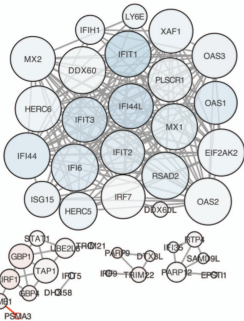

Th2 module (F)

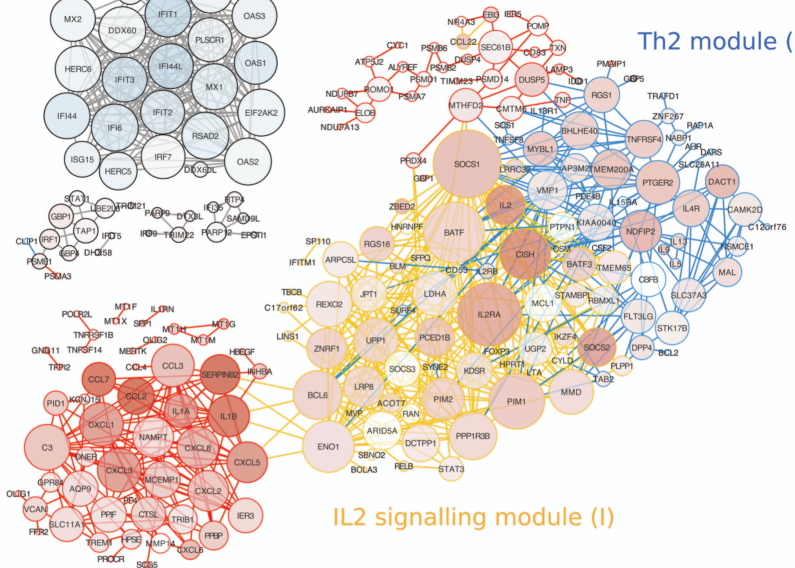

Source: https://www.biorxiv.org/content/biorxiv/early/2019/02/11/473561.full.pdf
